# Supplementary material for: Improving Precipitation Interpolation Using Anisotropic Variograms Derived from Convection-Permitting Regional Climate Model Simulations
Source: Copernicus journal article supplement (doi:10.5194/egusphere-2025-1779), 2025-06-10
Supplement: Supplementary file [file egusphere-2025-1779-AC3-supplement.pdf]

# Improving Precipitation Interpolation Using Anisotropic Variograms Derived from Convection-Permitting Regional Climate Model Simulations

Valentin Dura<sup>1,2</sup>, Guillaume Evin<sup>2</sup>, Anne-Catherine Favre<sup>2</sup>, and David Penot<sup>1</sup>

<sup>1</sup>EDF-DTG, Grenoble, France

<sup>2</sup>Univ. Grenoble Alpes, CNRS, INRAE, IRD, Grenoble INP\*, IGE, 38000 Grenoble, France

\*Institute of Engineering and Management Univ. Grenoble Alpes

**Correspondence:** Valentin Dura (valentin.dura@edf.fr)

## Abstract.

The consideration of the spatial variability of daily precipitation, assessed through spatial covariance, is crucial for hydrological modeling. Estimating this covariance is particularly challenging in regions with sparse rain gauge networks or limited radar coverage. To address this issue, this study explores the potential of Convection-Permitting Regional Climate Model (CP-RCM) simulations to estimate anisotropic variograms. We compare five approaches: (1) SPAZM, an interpolator based on local precipitation-altitude regressions, Trans-Gaussian Random Fields, differing by their covariance structure and data source with (2) isotropic covariance from rain gauges, (3) anisotropic covariance from rain gauges, (4) isotropic covariance from CP-RCM simulations, and (5) anisotropic covariance from CP-RCM simulations. The models are evaluated with cross-validation and spatial metrics using radar-derived analyses. Results demonstrate that Trans-Gaussian Random Fields outperform SPAZM. Anisotropic covariance models derived from CP-RCM simulations capture orography-induced directional precipitation structures more effectively than the other models, leading to improved interpolation accuracy and better representation of spatial variability. The generated ensemble of conditional simulations successfully reproduces intense precipitation events at the catchment scale, providing valuable uncertainty quantification. For a 17 km<sup>2</sup> catchment, mean catchment precipitation can range from 175 mm to 450 mm for a convective event, despite high rain gauge density. These findings highlight the benefits of using CP-RCM simulations to generate anisotropic variograms for probabilistic precipitation interpolation. This approach improves the spatial variability of precipitation, making it highly relevant for hydrological applications such as flood forecasting. Future work will explore the integration of these ensembles into probabilistic hydrological modeling.

## 1 Introduction

Gridded daily precipitation data is essential for various environmental applications, such as assessing flood and drought risks or modeling glacier mass balance. However, rain gauge stations provide sparse and irregular observations in space, necessitating spatial interpolation models to estimate precipitation fields. Common interpolation procedures include local regression (Daly et al., 1994; Gottardi, 2009; Verdin et al., 2016), data assimilation (Alpuim and Barbosa, 1999; Devers et al., 2021; Vernay et al.,

2024), geostatistics (Goovaerts, 2000; Sideris et al., 2014; Guédé et al., 2024), and more recently machine learning (Hengl et al., 2018; Sekulić et al., 2020; Zandi et al., 2022) models. Geostatistical models frequently outperform other statistical models for precipitation interpolation (Haberlandt, 2007; Bostan et al., 2012; Masson and Frei, 2014). They are considered Best Linear Unbiased Estimator (BLUE) methods (Rao et al., 1973), minimizing error variance but often producing excessive spatial smoothing that underestimates high precipitation intensities (Hofstra et al., 2010; Hiebl and Frei, 2018). To mitigate this issue, researchers use ensembles of equiprobable fields, known as conditional simulations (Frei and Isotta, 2019; Yan et al., 2021), all consistent with the measurements and the observational variance while displaying distinct spatial patterns.

Daily precipitation exhibits spatial autocorrelation as neighboring rain gauges often record similar values (Tobler, 1970). Spatial autocorrelation is mathematically modeled through the variogram (Cressie, 1991), which links spatial distance to observational variability. Traditionally, variograms are assumed to be isotropic, ignoring directional variations due to the limited number of rain gauge stations or for modeling simplicity (Adhikary et al., 2017). However, in complex topographic regions, anisotropy can arise from interactions between atmospheric conditions and mountain ranges (Tobin et al., 2011), degrading interpolation quality with isotropic variograms. To improve variogram estimation, researchers have explored alternative sources of spatial information, such as gridded precipitation products. Radar data has been used for deriving parametric or non-parametric variograms (Velasco-Forero et al., 2009; Schiemann et al., 2011) but is often available for shorter timeframes than the multidecadal period required for the daily precipitation analyses. [Numerical weather prediction ensembles have also been explored \(Khedhaouria et al., 2022\) to infer background error covariances in data assimilation approaches.](#) Alternatively, simulations from Convection-Permitting Regional Climate Models (CP-RCMs) (Rockel et al., 2008; Brousseau et al., 2016; Keuler et al., 2016; Gerber et al., 2018) are supplied on extended periods and deliver new possibilities to infer variogram estimation. Although daily CP-RCM precipitation fields are frequently biased (Caillaud et al., 2021), they might still provide relevant information about anisotropy structure. This study evaluates the accuracy of daily precipitation interpolation by comparing isotropic and anisotropic variograms derived from rain gauges. It also investigates the potential of CP-RCM simulations for deriving anisotropic variograms, a novel approach that has not been previously explored. Additionally, the study aims to quantify the uncertainty in spatial interpolation at the catchment scale, a critical factor for hydrological modeling, which is rarely found in precipitation analyses or reanalysis (Frei and Isotta, 2019; Devers et al., 2021, 2024).

To address these objectives, we evaluate the ensemble means (kriging) and ensemble spreads (conditional simulations) from geostatistical models in a cross-validation framework across 786 intense precipitation events. We compare four types of variogram: (1) isotropic variogram estimated with rain gauge stations, (2) anisotropic variogram estimated with rain gauge stations, (3) isotropic variogram estimated with CP-RCM simulations, and (4) anisotropic variogram estimated with CP-RCM simulations. The geostatistical models are also compared to SPAZM (Gottardi, 2009), an interpolator based on local precipitation-altitude regressions stratified by weather patterns. Beyond point-scaled validation, we assess spatial structure using radar-derived analyses as a reference and evaluate the ability of the ensemble spread to capture mean catchment precipitation, an essential factor for hydrological modeling. The analysis is conducted over a mountainous region near the French Mediterranean Sea. This area encounters heavy rainfall due to the interaction of the air masses with elevation, offering an ideal setting for the study. The paper is structured as follows: Section 2 describes the domain under study and the available precipita-

tion datasets. Section 3 introduces the four covariance ~~modelings~~models used for spatial interpolation. Section 4 displays the cross-validation and spatial evaluation results. Section 5 compares the findings to the existing literature and discusses future perspectives. Finally, Section 6 outlines the conclusions.

2 Domain and data under study

2.1 Study domain

The present study focuses on the Cevennes region in the southern Central Massif (see Fig.1). This mountainous study area is characterized by rugged terrain, including high plateaus and forested hills, with elevations reaching 1,700 m. Annual precipitation experiences significant spatial variability. The higher elevations can collect more than 2,000 mm while the lower foothills present a Mediterranean climate with annual ~~precipitations~~precipitation ranging from 600 to 1,200 mm (Canellas et al., 2014). Winter precipitation can fall as snow at high elevations, even if snow cover is intermittent. Autumn is the wettest season. The moisture-laden air from the warm Mediterranean Sea faces colder air from the north, leading to frequent extreme rainfall events of 300-500 mm and generating heavy floods in the valleys (Delrieu et al., 2005).

| ID | Name                           | Surface (km <sup>2</sup> ) | Mean altitude (m) | Maximum altitude (m) |
|----|--------------------------------|----------------------------|-------------------|----------------------|
| A  | Altier at la Goulette          | 106                        | 1156              | 1629                 |
| B  | Chassezac at Pont du Mas       | 51                         | 1246              | 1440                 |
| C  | Chassezac at Sainte-Marguerite | 413                        | 1056              | 1629                 |
| D  | Thines at Pont de Gournier     | 17                         | 878               | 1065                 |

Table 1. ID, name, surface area in km<sup>2</sup>, mean and maximum altitude in m of the four catchments. Figure 1 shows the locations of the catchments.

2.2 Rain gauge observations

To capture the spatial variability of precipitation induced by the complex topography, a dense network of 973 rain gauges is available, including 197 stations in the study domain and 776 additional stations near the borders of the study domain. Rain gauges are up to 1,500 m, encompassing the full elevation distribution. The number of available rain gauges on a daily timescale varies over the years, ranging from a minimum of 625 to a maximum of 836. The observed data were not quality-controlled in this study. Because we do not work with climatological statistics, temporal discontinuity is not a major issue. However, outliers may still occur and could affect the interpolated fields. Such outliers may influence local results, but we do not expect them to alter the conclusions of this study. Before applying the method in an operational or real-time context, a quality control procedure is needed, including a spatial anomaly analysis to identify outliers that exceed physically plausible differences from nearby stations under similar terrain characteristics, followed by a homogeneity test such as the Standard Normal Homogeneity Test (SNHT, Alexandersson, 1986).

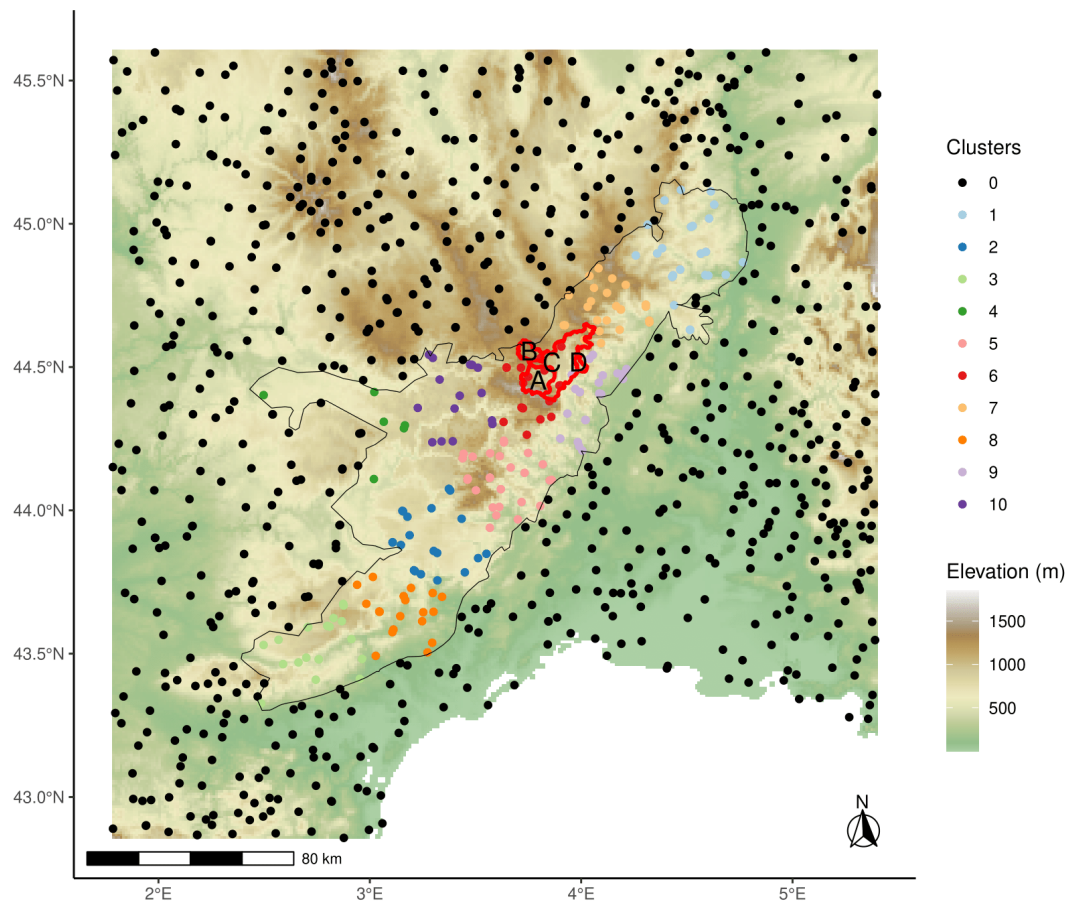

**Figure 1.** Study domain (1.7—5.5°E, 42.8–45.6°N), colored by the elevation (height above sea level in meters), borders of the Cévennes region (black lines), borders and ID of four catchments (red lines, used in sections 3–5), and location of rain gauge stations (dots, around 800 stations available per day). The colors of the stations (dots) are explained in Section 3. Table 1 gathers information about the catchments.

Study domain (1.7—5.5°E, 42.8–45.6°N), colored by the elevation (height above sea level in meters), borders of the Cévennes region (black lines), borders and ID of four catchments (red lines, used in sections 3–5), and location of rain gauge stations (dots, around 800 stations available per day). The colors of the stations (dots) are explained in Section 3. Table 1 gathers information about the catchments.

85 **ID Name Surface (km<sup>2</sup>) Mean altitude (m) Maximum altitude (m)** A Altier at la Goulette 106 1156 1629 B Chassezac at Pont Du Mas 51 1246 1440 C Chassezac at Sainte-Marguerite 413 1056 1629 D Thines at Pont de Gournier 17 878 1065 ID, name, surface-area in km<sup>2</sup>, mean and maximum altitude in m of the four catchments. Figure 1 shows the locations of the catchments.

## 2.3 Meteorological data

### 2.3.1 COMEPHORE

The product called COMbinaison en vue de la Meilleure Estimation de la Precipitation HOraIRE (COMEPHORE) (Champeaux et al., 2009) is a high-resolution precipitation analysis product for France, developed at Meteo-France, and based on radar-gauge merging to generate spatial precipitation estimates at an hourly timescale with a spatial resolution of 1 km. COMEPHORE is assumed as a reference to assess the spatial variability of precipitation, taking advantage of the radar cover-  
age. COMEPHORE covers the 1997 - 2025 period but presents a methodology change in 2007, which separates interpolation for convective and stratiform precipitation. It uses the radar corrected by rain gauges to estimate convective precipitation and performs ordinary kriging of the rain gauge amounts for stratiform precipitation using an isotropic variogram. Using radar data, COMEPHORE can accurately represent the size and direction of precipitation cells, and the very local storm cells that the rain gauge network could miss. For this study, we aggregated the COMEPHORE hourly precipitation fields at the daily timescale over the 2008 - 2017 period. Some studies use COMEPHORE as a reference to evaluate climate models (Caillaud et al., 2021), and others use it for hydrological modeling (Evin et al., 2024).

### 2.3.2 AROME

AROME simulations (Caillaud et al., 2021) are ~~generated through the~~ produced with the convection-permitting RCM AROME in its NWP configuration cycle 41t1, which uses 60 vertical levels from 10 m to 1 hPa, including 21 levels below 2000 m to better resolve the lower-tropospheric dynamics over complex Alpine terrain. In this CP-RCM AROME, ~~using hourly atmospheric inputs provided by a configuration,~~ deep convection is explicitly resolved, while only shallow convection remains parameterized. The AROME domain over the Alpine region lies approximately 300–400 km from the lateral boundaries, which are forced by hourly outputs from the CNRM-ALADIN RCM ~~simulation (Nabat et al., 2020), which is driven by~~ (Nabat et al., 2020). ALADIN uses 91 vertical levels together with spectral nudging to ensure consistency with the large-scale circulation imposed by the ERA-Interim reanalysis (Dee et al., 2011). ~~The~~ AROME simulations are available at the hourly timescale for the Alpine region, as described in the Flagship Pilot Study of the Coordinated Regional Climate Downscaling Experiment (~~CORDEX-FPS, Fantini et al. (2018)), (CORDEX-FPS, Fantini et al., 2018),~~ at 2.5 km spatial resolution, and cover the ~~1982–2018 years. In the study, AROME simulations 1982–2018 years. Hourly outputs~~ are aggregated to a daily timescale. ~~Unlike RCM models, the AROME model fully resolves convection processes, removing parametrization. The 2.5 km-resolution allows for capturing fine-scale atmospheric processes.~~ Previous studies (Ban et al., 2021; Caillaud et al., 2021; Monteiro et al., 2022) ~~have demonstrated show~~ that AROME provides ~~an improved a more realistic~~ representation of intense precipitation ~~events compared to the RCM-ALADIN model despite biases in the size and location of convective cells. than its driving model ALADIN, despite persistent biases. In a Lagrangian evaluation over the Mediterranean region, which includes our study domain, Caillaud et al. (2021) reports that AROME simulations reproduce well the location, intensity, frequency, and interannual variability of heavy precipitation events. Remaining biases are mostly due to the model, rather than insufficient constraints from ERA-Interim. In the AROME model, very intense daily amounts ( $> 200 \text{ mm. day}^{-1}$ ) tend to~~

125 be underrepresented, the spatial extent of intense convective cells is overestimated, and their propagation speed is slightly too high. These biases could be reduced by further refining horizontal and vertical resolution and by improving the parameterization of residual shallow and dry convection. Unlike a short-term NWP forecast, AROME-climate simulations do not assimilate observations such as radar reflectivity; therefore, they are not expected to reproduce individual events exactly, but rather their typical spatial structures. Consequently, even if absolute precipitation amounts may be biased, the spatial organization and anisotropy of intense precipitation systems, key for informing the anisotropic covariogram, may be sufficiently well captured by AROME to support our interpolation framework.

### 2.3.3 SPAZM

130 SPAZM (Gottardi, 2009) creates daily precipitation analyses at 1 km spatial resolution over a large part of France since 1948 and is continually updated by Electricité de France (EDF) for hydrological modeling. The daily precipitation fields constitute an adjustment of a climatological background field using the daily rain gauge amounts. A climatological background field represents the average daily structure of the precipitation field, where the influence of topography is easier to account for. The background fields incorporate local orographic effects conditioned by eight weather patterns. SPAZM leads to balanced water  
135 budgets at the annual scale, even in mountainous areas (Ruelland, 2020). However, the spatial variability of the daily fields is questionable, with an unrealistic correlation to the altitude. Moreover, SPAZM underestimates the spatial variance of intense precipitation, resulting in overly smoothed precipitation fields (Penot, 2014).

### 2.4 Study period

140 The study period ranges from 1982 to 2018, which corresponds to the availability of AROME simulations. 786 precipitation events (nearly 20 events per year), defined as the days with at least 50 mm recorded at a minimum of five rain gauges, are selected. Most of the 786 precipitation events arise from southerly atmospheric flow and central depression patterns, where strong orographic intensification is expected. Some winter events also include snowfall at high elevations.

## 3 Methods

### 3.1 Spatial Interpolation

145 This study develops a probabilistic geostatistical framework for daily precipitation interpolation, using four variograms derived from rain gauges and CP-RCM simulations. Unlike traditional approaches that rely solely on rain gauge data, our method exploits CP-RCM fields to estimate daily isotropic and anisotropic covariance structures. In the following, we detail the stochastic modeling and evaluation procedures.

### 3.1.1 Data transformation

150 Geostatistics involving kriging methods are built in the Gaussian paradigm (Diggle et al., 2003). However, daily precipitation data often exhibits a positively skewed distribution due to left truncation at zero precipitation and the presence of high values. To address this issue, we assume the positive precipitation follows a Gamma distribution and apply quantile-quantile transformation (Gyasi-Agyei, 2018) to normalize the data each day. We perform Gamma fitting using the maximum-likelihood approach from the *fitdistr*  package (Delignette-Muller and Dutang, 2015). Spatial interpolation is then conducted in the  
155 Gaussian domain. Skewness and heteroscedasticity of the precipitation data are thus explicitly considered (Erdin et al., 2012), theoretically resulting in greater interpolation uncertainty in areas with high precipitation.

The modelization steps include:

1. Gamma to Normal transformation of positive precipitation:

~~$Y^* = \Phi^{-1}[F_\gamma(Y)]$~~   $Y^* = \Phi^{-1}[u_0 + (1 - u_0)F_\gamma(Y)]$ , where  $Y$  represents daily positive observed precipitations,  $F_\gamma$  the  
160 distribution function of a Gamma distribution,  $\Phi^{-1}$  is the quantile function of a Gaussian distribution with zero mean and unit variance, ~~and  $Y^*$  are the normalized precipitations.~~

2. ~~Gamma to Normal transformation of zero precipitation: The zeros are transformed to  $\Phi^{-1}[F_\gamma(u_0)]$  with  $u_0$  the~~ empirical probability of zero precipitation, estimated by the number of rain gauges with less than 0.5 mm over the total number of rain gauges, and  $Y^*$  are the normalized precipitations.

- 165 3. Gamma to Normal transformation of zero precipitation:  
The zeros are transformed to  $\Phi^{-1}[\mathcal{U}(0.01, u_0)]$ ,  $\mathcal{U}$  is the uniform distribution.

4. Conditional simulations from geostatistical models (detailed in subsection 3.1.2).

5. Back-Transformation of precipitation predictions into Gamma distribution:

$$\hat{Y} = F_\gamma^{-1}[\Phi(\hat{Z})]. \text{ After the back-transformation step, all values lower than } F_\gamma^{-1}(u_0) \text{ are set to 0. } \hat{Y} = \begin{cases} F_\gamma^{-1}\left\{\frac{\Phi(Y^*) - u_0}{1 - u_0}\right\}, & \Phi(Y^*) > u_0 \\ 0, & \text{otherwise} \end{cases}$$

170 Once the precipitation data is normalized, we model its spatial structure using geostatistical models, focusing on estimating covariance structures through variogram fitting.

### 3.1.2 Geostatistic models

Precipitation should be centered in the first instance to estimate its covariance structure accurately (Schabenberger and Gotway, 2005). To handle the strong non-Gaussianity of daily precipitation (positivity and skewness), we assume that the rainfall field  
175 can be represented as a Trans-Gaussian Random Field. That is, there exists a transformation such that the transformed field follows a second-order stationary Gaussian random field. The expectation of the Trans-Gaussian Random Field is modeled in the Gaussian domain as a function of geographical predictors (longitude, latitude, and altitude) and a seasonal climatological

background field. The literature commonly employs geographical predictors such as altitude in kriging with external drift model (Bárdossy and Pegram, 2013). The seasonal climatological background fields have been built through Random Forest modelization using CP-RCM simulations in (Dura et al., 2024). Their construction is based on the idea that the fine-resolution simulations of climate models should summarize the topographical influence on precipitation. Climatological background fields have been used broadly (see e.g. Hunter and Meentemeyer, 2005; Gottardi, 2009; Masson and Frei, 2014) to summarize long-term precipitation patterns influenced by orography, improving the robustness of daily precipitation interpolation. We successfully check the absence of multicollinearity by computing the correlation matrix among the predictors.

Spatial interpolation requires the estimation of a spatial covariance. We fit each day four different exponential variograms, all including a nugget effect:

- an isotropic variogram estimated with rain gauge observations (rgISO),
- an anisotropic variogram estimated with rain gauge observations (rgANISO),
- an isotropic variogram derived from daily AROME precipitation field (arISO),
- an anisotropic variogram derived from daily AROME precipitation field (arANISO).

The nugget parameter corresponds to micro-scale precipitation variability and measurement errors. The exponential choice is standard in numerous geostatistical studies (Masson and Frei, 2014; Frei and Isotta, 2019) because it effectively captures the gradual decline in autocorrelation as the separation distance increases. The weighted least-square estimation of the variograms is done in the Gaussian domain for both rain gauge and AROME precipitations. The weights are proportional to the number of pairs of observations and inversely proportional to the squared average distance between them. ~~The estimation process only uses We selected only 25 % (randomly selected) of the of AROME grid cells for computational reasons. to compute variograms to balance spatial representativeness and computational cost. These selected cells were treated as virtual gauges when computing empirical variograms. To confirm robustness, we performed a sensitivity test using 100 % of cells for a subset of events, which produced similar anisotropy parameter estimates (not shown).~~ We note  $\eta$  and  $\theta$  as the estimated anisotropy ratio and angle. Schiemann et al. (2011) describes the methodology in more detail, with an ordinary least square estimation in contrast to a weighted least square estimation. The variograms are estimated with the *gstat*  packages (Pebesma, 2004).

### 3.1.3 Conditional simulations

Conditional simulation of Trans-Gaussian Random Field is conducted using sequential Gaussian simulations implemented in the *gstat*  package (Pebesma, 2004) to create each day an ensemble of 100 simulations. Gyasi-Agyei (2018) states that the conditional simulations obtained with *gstat* are too granular. They decided to apply a  $3 \times 3$  window smoothing technique. We do not apply the same post-processing step because we will, in future developments, employ mean catchment precipitation, which is not sensitive to the granularity. While this ensemble size is sufficient for representing precipitation variability (Frei and Isotta, 2019), it does not account for all sources of uncertainty, such as covariance parameters inference or precipitation undercatch (see subsection 5.3).



## 210 3.2 Evaluation

In our analysis, the ensemble mean of the conditional simulations is equivalent to the result obtained using deterministic kriging with external drift (Schabenberger and Gotway, 2005) (KED). Later in the article, we will use the terms "kriging" and "ensemble mean" interchangeably. While kriging captures the most likely precipitation value, the conditional simulations capture the entire ensemble of possible realizations, providing spatial uncertainty. To assess the performance of the spatial  
215 interpolation models, we evaluate both deterministic and probabilistic interpolated precipitation fields. The evaluation focuses on three key aspects:

- point-scale accuracy using cross-validation on rain gauge stations ;
- spatial structure by comparing interpolated fields with radar-derived precipitation analyses ;
- uncertainty quantification by analyzing the ensemble spread of conditional simulations at the catchment scale.

220 The models are evaluated on 786 precipitation events (nearly 20 events per year), defined as the days with at least 50 mm recorded at a minimum of five rain gauges.

### 3.2.1 Cross-validation of ensemble means

The deterministic performance of the spatial interpolation models is evaluated through a leave-cluster-out cross-validation scheme. Unlike traditional leave-one-out cross-validation, this procedure removes entire clusters of neighboring stations to  
225 better mimic ungauged conditions and accentuate performance differences between the models. An accurate covariance estimation is crucial for sparse rain gauge station networks. Sequentially, a cluster of neighboring stations is removed from the training dataset and then predicted. Ten groups of stations are created by the K-means algorithm (MacQueen, 1967). The clustering variables are the longitude and the latitude of the stations. Figure 1 indicates the rain gauge station clusters.

The evaluated models include (1) SPAZM as the deterministic interpolation model, (2) rgISO: Kriging with an external drift  
230 with an isotropic variogram estimated from rain gauge data, (3) rgANISO: Kriging with an external drift with an anisotropic variogram estimated from rain gauge data, (4) arISO: Kriging with an external drift with an isotropic variogram derived from CP-RCM precipitation fields, (5) arANISO: Kriging with an external drift with an anisotropic variogram derived from CP-RCM precipitation fields. Mean error (ME) measures bias, indicating systematic over- or underestimation. Mean absolute error (MAE) quantifies overall prediction accuracy.

### 235 3.2.2 Spatial Structure Evaluation with Radar Analyses

Beyond point-scale accuracy, we assess whether interpolated precipitation fields reproduce the true observed spatial variability. The Teweles–Wobus Score (TWS, Teweles and Wobus (1954)) is used to compare the spatial gradients of interpolated precipitation fields with those from the radar-based COMEPHORE fields. Subsection 2.3.1 describes the COMEPHORE data. We consider COMEPHORE fields as a reference in the study domain because of the good radar coverage, allowing an ac-

240 curate representation of the size and direction of the heavy precipitation cells. It should be noted that for stratiform events, COMEPHORE could favor geostatistic models with isotropic covariance by construction.

TWS is defined as:

$$\text{TWS} = \frac{\sum_{(s,s') \in \text{Adj}} |(p_s - p_{s'}) - (\hat{p}_s - \hat{p}_{s'})|}{2 \sum_{(s,s') \in \text{Adj}} \max(|p_s - p_{s'}|, |\hat{p}_s - \hat{p}_{s'}|)},$$

where Adj is the set of adjacent grid points  $(s, s')$  in the northern-southern and eastern-western direction within the study domain,  $p_s$  ( $\hat{p}_s$ ) is the COMEPHORE (predicted) daily precipitation amount at the grid point  $s$  divided by the maximum grid amount. In this part, the interpolated fields are obtained using all rain gauges in the study domain. This metric is particularly  
 245 relevant for evaluating the performance of variograms in capturing directional precipitation patterns. Lower values of TWS indicate better agreement with radar-based spatial structures.

Additionally, spectral analysis allows comparison of spatial variability across scales and is well-suited to assess whether predictions preserve the multiscale structure of precipitation. The two-dimensional Fourier power spectrum was computed for the reference (COMEPHORE) and predicted fields, and averaged radially in wave-number. For scaling processes, the  
 250 radius-averaged spectrum follows a power-law relationship:  $E(k) \propto k^{-\beta}$ , where  $k$  is the wave number and  $\beta$  is the spectral slope. The slope  $\beta$ , estimated from a linear fit in log-log space, was used as the comparison metric. Similar values of  $\beta$  indicate similar spatial variability between reference and predicted fields. We compare the slopes using ME, RMSE, and slope best-fit line metrics. Whereas TWS evaluates short-range gradient image similarities, this comparison evaluates spatial multi-scale dependencies of the daily precipitation fields.

### 255 3.2.3 Probabilistic Performances and Uncertainty Quantification

The ensemble spread of conditional simulations provides uncertainty estimates for interpolated precipitation fields. We evaluate whether these uncertainty estimates are both statistically reliable and hydrologically relevant.

We evaluate probabilistic performances from the geostatistical models (rgISO, rgANISO, arISO, arANISO) using Continuous Ranked Probability Score (Matheson and Winkler, 1976) (CRPS) metrics on the 786 precipitation events using the  
 260 same leave-one-cluster out procedure. A lower CRPS indicates better probabilistic distribution. To assess whether interpolation uncertainty translates into hydrologically realistic precipitation estimates, we compare, for the 20 most intense events, the ensemble spread of mean catchment precipitation (from conditional simulations) to the radar-derived mean catchment precipitation (from COMEPHORE). A reliable spatial interpolation model should ensure that the observed catchment precipitation falls within the simulated uncertainty range.

265 Table 2 summarizes the considered metrics.

### 3.2.4 Case studies

We illustrate applications of the spatial interpolation models to provide concrete examples of how variograms affect precipitation interpolation. We In subsection 4.4, we show ensemble means, a sample of conditional simulations, and fitted anisotropic variograms for the 2008-05-26 and the 2014-09-18 days. The first event is an example of a South-North anisotropic event. The

| Metric                | Evaluates                  | Application                             |
|-----------------------|----------------------------|-----------------------------------------|
| ME                    | Bias in predictions        | Kriging (ensemble mean) + SPAZM         |
| MAE                   | Overall accuracy           | Kriging (ensemble mean) + SPAZM         |
| TWS                   | Spatial variability        | Kriging (ensemble mean) + SPAZM         |
| <u>Power spectrum</u> | <u>Spatial variability</u> | <u>Kriging (ensemble mean) + SPAZM</u>  |
| CRPS                  | Probabilistic reliability  | Full ensemble (conditional simulations) |

**Table 2.** Metrics computed for evaluation.

270 second is a Cevenol episode, with stationary storm cells, resulting in 300–400 mm precipitation amount in the first foothills of the Cevennes region.

## 4 Results

We conduct cross-validation at rain gauge stations and evaluate spatial structure using a radar-based metric to assess the performance of deterministic and stochastic models. The reliability of ensemble spreads is also examined. The ensemble of  
275 simulations provides uncertainty quantification, which is crucial for hydrological applications. Additionally, we illustrate the methodology with two case studies of daily precipitation fields, showing ensemble means and conditional simulations.

### 4.1 Evaluation of ensemble means

Leave-one-cluster-out cross-validation evaluates the accuracy of ensemble means for all rain gauge stations in the ~~Cevennes~~  
Cévennes region. We compute the mean error and mean absolute error on intense precipitation ( $\geq 50$  mm) for the 786 events.  
280 SPAZM has lower spatial interpolation skills than rgISO, rgANISO, arISO, and arANISO (Fig.2). Notably, SPAZM systematically underestimates intense precipitation in the northernmost high-altitude areas, with mean errors ranging from -30 to -50 %, whereas other models (rgISO, rgANISO, arISO, arANISO) show less severe underestimation (-20 to -30 %). SPAZM simultaneously underestimates and overestimates precipitation at neighboring stations, raising concerns about its robustness. rgISO, rgANISO, arISO, and arANISO all underestimate intense precipitation on average. The anisotropy contribution is only  
285 visible in the mean absolute error for the most northeasterly rain gauge stations.

### 4.2 Spatial evaluation using radar-analysis

To complement cross-validation, the TWS investigates the image gradient similarities, taking COMEPHORE fields as references. Lower TWS values indicate a better resemblance to COMEPHORE. Figure 3 illustrates the distribution of TWS values for three event classes: (1) Low anisotropy events ( $0.75 \leq \eta \leq 1$ ), (2) Medium anisotropy events ( $0.5 \leq \eta \leq 0.75$ ), (3) Strong  
290 anisotropy events ( $0 \leq \eta \leq 0.5$ ).  $\eta$  results from the anisotropy ratio estimation with the daily AROME fields. TWS scores ~~demonstrate a lower gradient image resemblance to COMEPHORE for SPAZM and a better resemblance for arANISO when strong anisotropy occurs. rgANISO does not outperform rgISO in image gradient similarities. The estimation of anisotropic variograms with rain gauges causes a loss of robustness, which is not attenuated even when strong anisotropy arises~~show that

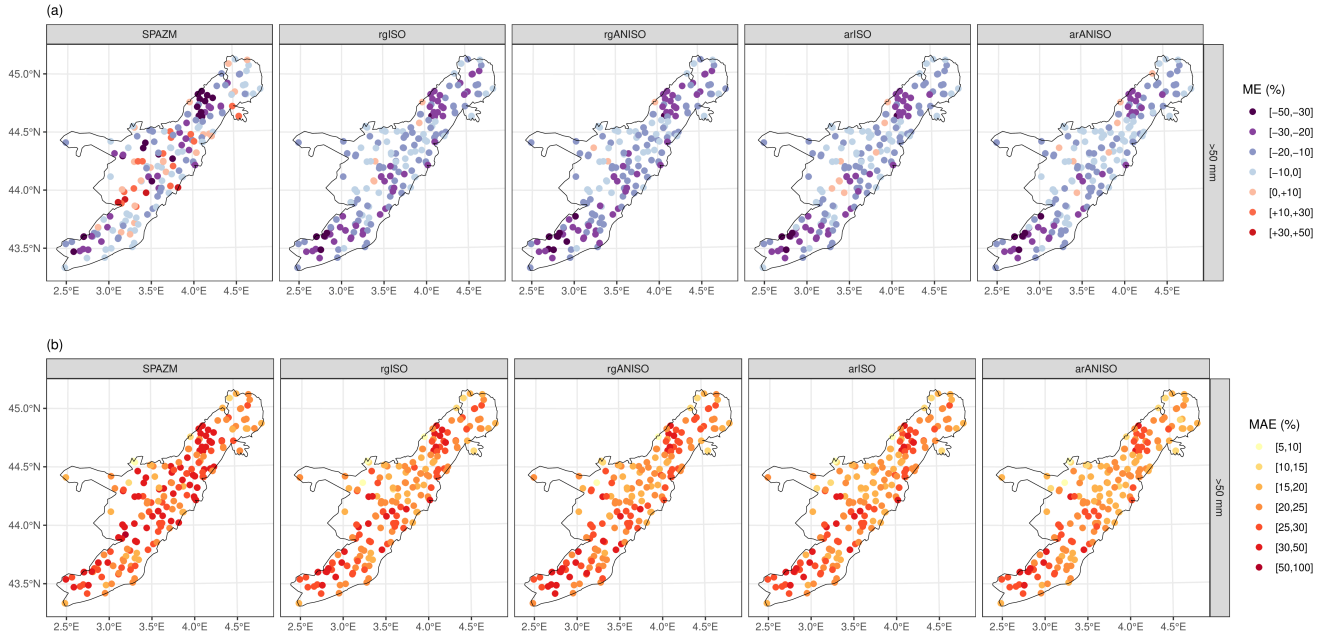

**Figure 2.** Cross-validation mean error (ME, **(a)**) and mean absolute error (MAE, **(b)**) for rain gauge stations in the Cevennes region, considering days with more than 50 mm. Results are shown for deterministic models (SPAZM) and stochastic models (rgISO, rgANISO, arISO, arANISO). For stochastic models, the cross-validation is conducted on the mean of 100 ensemble members from conditional simulations. Black contours indicate the Cevennes region.

SPAZM exhibits lower image gradient similarity to COMEPHORE than all geostatistical approaches, regardless of the event type, indicating a poorer representation of spatial gradients. For both isotropic and anisotropic configurations, AROME-based methods (arISO and arANISO) consistently outperform their counterparts that use only rain gage data (rgISO and rgANISO). This systematic improvement suggests that the use of AROME fields allows for a more accurate estimation of the precipitation covariance structure and, consequently, a better reproduction of spatial gradients. Using only rain gauges, rgANISO outperforms rgISO for strongly anisotropic events, whereas the opposite behavior is observed for weakly anisotropic events. This indicates that accounting for anisotropy can improve gradient similarity when anisotropy is pronounced, but the limited robustness of anisotropic variogram estimation from rain gauges alone prevents drawing firm conclusions for weakly anisotropic cases. In contrast, arANISO consistently outperforms arISO, with a marked improvement for strongly anisotropic events and a slight but systematic improvement for weakly anisotropic ones. As no robustness issues arise in the estimation of anisotropic variograms when using AROME fields, these results provide stronger evidence of the added value of explicitly accounting for anisotropy in the representation of the spatial variability of precipitation. COMEPHORE relies on kriging for stratiform precipitation and radar data observations for convective precipitation. For this reason, models (rgISO, rgANISO, arISO, arANISO) built on the Trans-Gaussian framework unsurprisingly outperform SPAZM. However, While COMEPHORE uses isotropic covariance in

the kriging step, ~~meaning only radar carries anisotropy~~ anisotropy is introduced through the radar component. This suggests that ~~the anisotropic variogram allows the mimicking of radar fields~~ anisotropic variograms, particularly when informed by AROME fields, help better reproduce the spatial structure of radar-derived precipitation patterns.

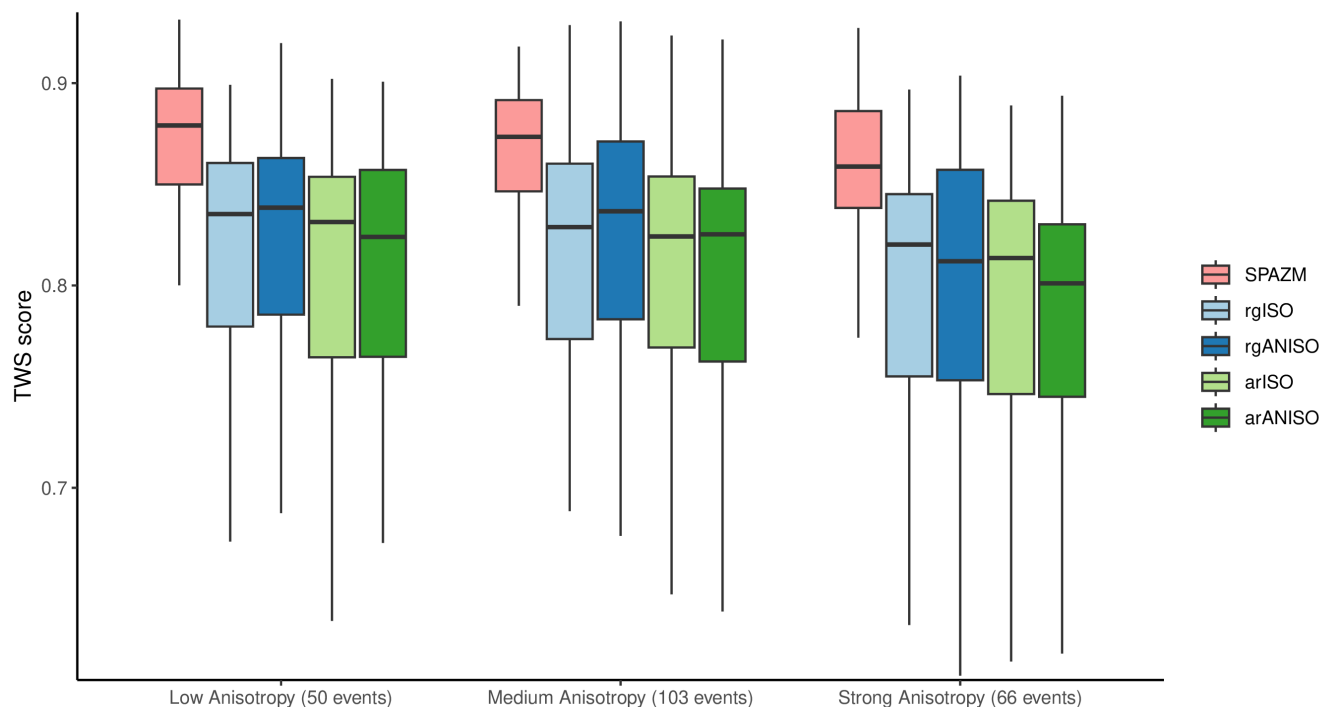

**Figure 3.** Distribution of TWS scores for deterministic models (SPAZM) and stochastic models (rgISO, rgANISO, arISO, arANISO). Low values of TWS scores indicate better image gradients, using COMEPHORE fields as references. The distributions of TWS scores are plotted for low estimated anisotropy ratio ( $0.75 \leq \eta \leq 1$ , left), medium estimated anisotropy ratio ( $0.5 \leq \eta \leq 0.75$ , center), and strong estimated anisotropy ratio ( $0 \leq \eta \leq 0.55$ , right). The number of events is displayed per event class. For the stochastic models, the evaluation is conducted over the mean of 100 ensemble members of conditional simulations.

Fig. 4 presents the spectral slopes of the reference and predicted precipitation fields. SPAZM systematically underestimates the highest slopes, indicating an overestimation of fine-scale spatial variability. Compared to rgISO, rgANISO degrades the representation of spatial variability for weakly anisotropic events and provides only limited improvement for strongly anisotropic events. In contrast, arISO and arANISO improve the representation of spatial variability, particularly for strongly anisotropic events. Among them, arANISO better reproduces spatial variability, as the highest spectral slopes are no longer underestimated.

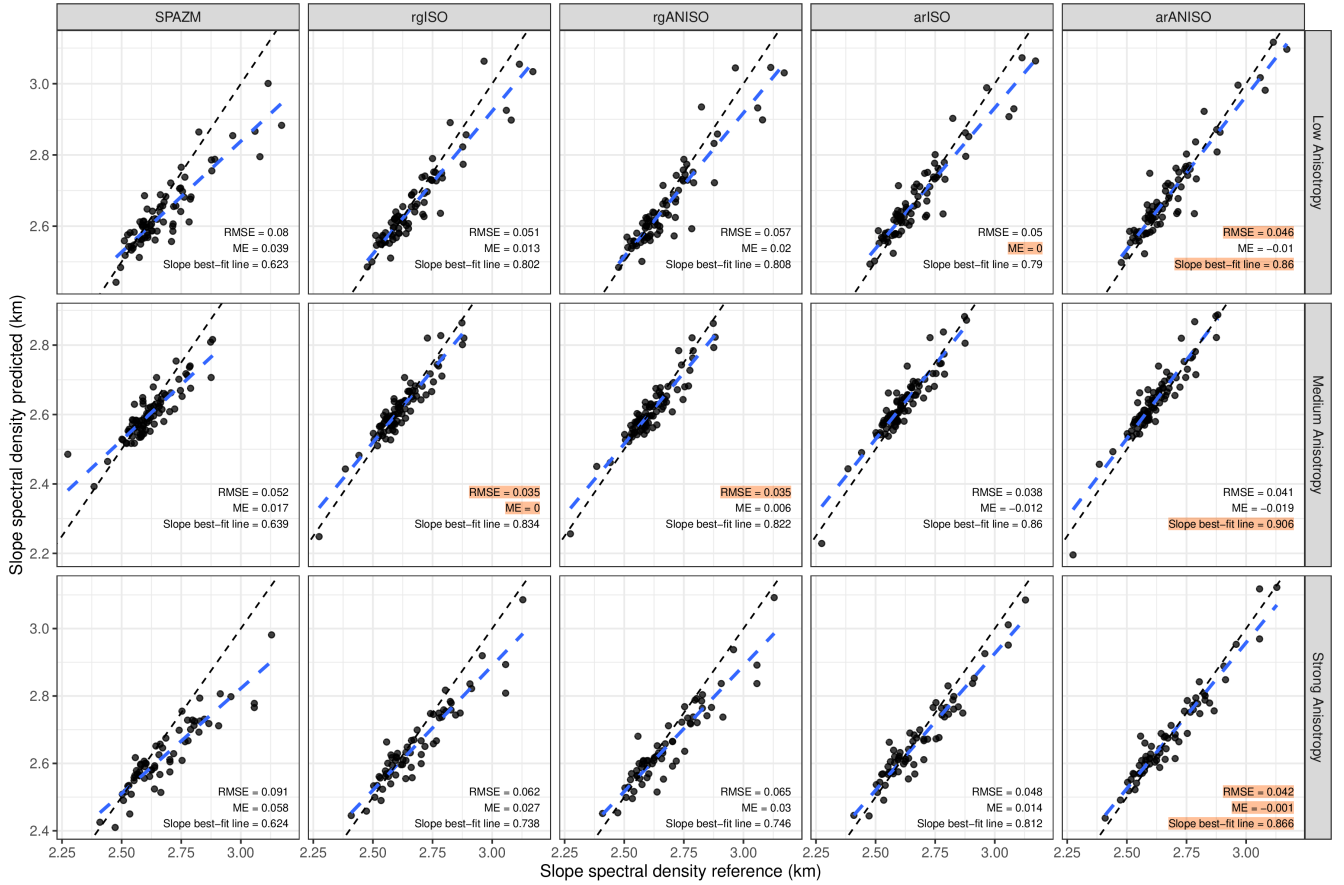

**Figure 4.** Scatter plots of the slopes of the radius averaged spectral density, using COMEPHORE data (reference) and the other gridded precipitation products models (SPAZM, rgISO, rgANISO, arISO, arANISO). The scatter plots of slopes are plotted for low estimated anisotropy ratio ( $0.75 \leq \eta \leq 1$ , top), medium estimated anisotropy ratio ( $0.5 \leq \eta < 0.75$ , center), and strong estimated anisotropy ratio ( $0 \leq \eta < 0.55$ , bottom). The dashed line represents the diagonal. Best model are highlighted per anisotropy class and metrics (ME, RMSE, best-fit line). For the stochastic models, the slopes are computed over the mean of 100 ensemble members of conditional simulations.

### 4.3 Probabilistic performances and Uncertainty Quantification

To assess the reliability of ensemble simulations, we apply the same cross-validation approach used for evaluating ensemble means (see Subsection 4.1). The Continuous Ranked Probability Score (CRPS) is computed to quantify probabilistic prediction accuracy, where lower values indicate better performance. Distribution of CRPS scores reveals similar performances for rgISO, rgANISO, and arISO but a notable improvement with arANISO (Fig.5). The error reduction is substantial for strong anisotropy events. This suggests that integrating anisotropy into the covariance structure using AROME enhances the ability of the ensemble to capture observed daily precipitation. [Figure S1 in the Supplementary Materials demonstrates that this result holds across all weather regimes. Figure S2 further shows that the result also applies to lower precipitation intensity ranges](#)

325 (1–20 mm and 20–50 mm). For this reason, we later quantify precipitation uncertainty using conditional simulations from anisotropic covariance, derived from AROME simulations.

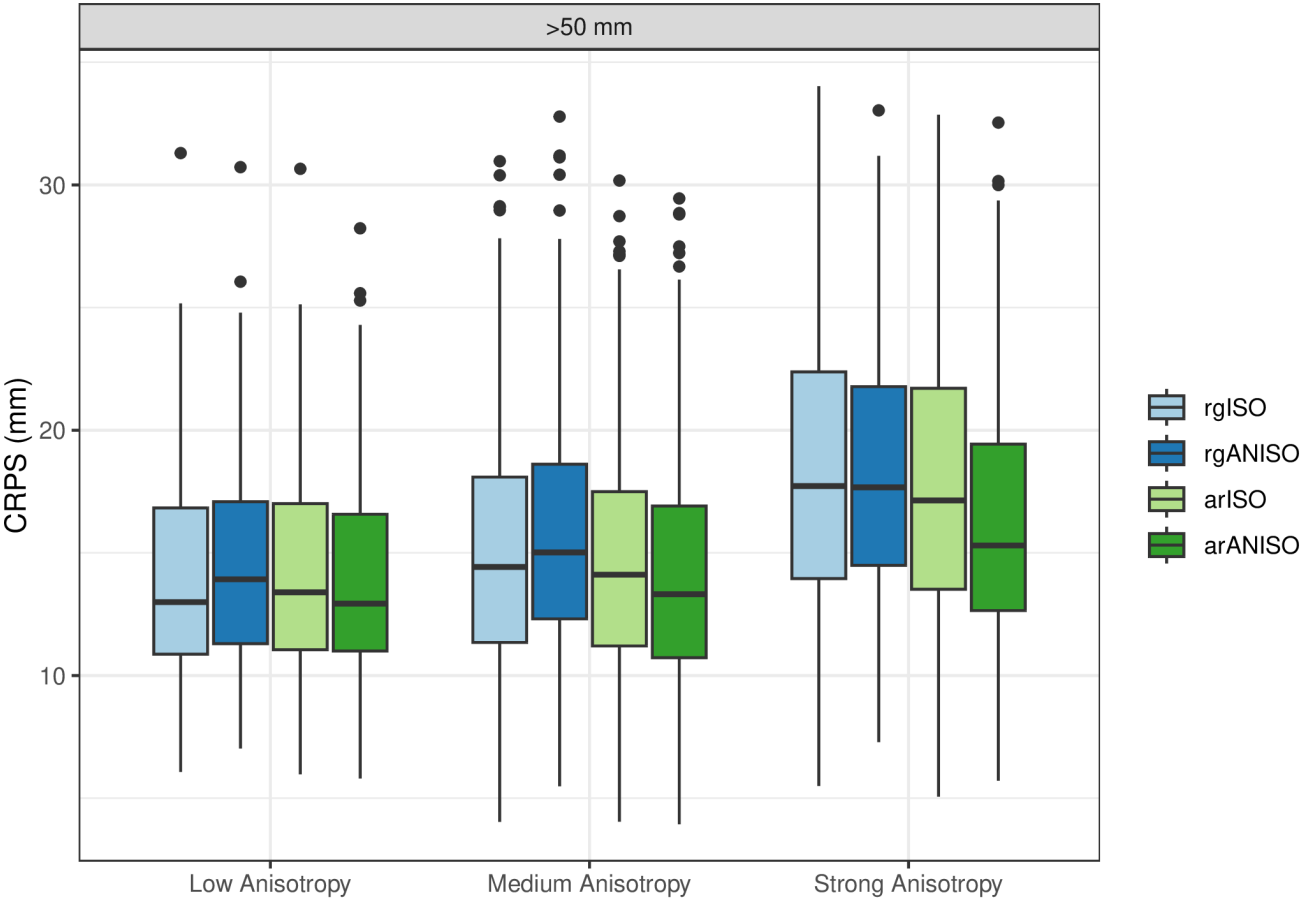

**Figure 5.** Distribution of cross-validation CRPS scores for stochastic models (rgISO, rgANISO, arISO, arANISO). 1 mean value of CRPS is obtained for each station within the Cevennes region for the days with more than 50 mm. Lower CRPS values indicate better spatial interpolation. The distributions of CRPS scores are plotted for low estimated anisotropy ratio ( $0.75 \leq \eta \leq 1$ , left), medium estimated anisotropy ratio ( $0.5 \leq \eta \leq 0.75$ , center), and strong estimated anisotropy ratio ( $0 \leq \eta \leq 0.5$ , right).

For the 20 most intense events, the mean catchment precipitations derived from the ensembles of 100-member arANISO from conditional simulations closely agree with COMEPHORE estimates (Fig.6) with a high rain gauge density. The interquartile range of the simulations frequently contains the mean COMEPHORE precipitation for the Chassezac at Sainte-Marguerite and the Thines at Pont de Gournier catchments. For the Chassezac at Pont du Mas catchment, the interquartile range does not necessarily encompass COMEPHORE precipitation, but the full range of the ensemble does encompass it. This suggests the reliability of the uncertainty estimates provided by the ensemble. arANISO is robust, as conditional simulations nearly agree

330

with COMEPHORE estimates in an ungauged scenario. The artificial decrease of rain gauge density causes a slight negative bias in the conditional simulations. The latter frequently contain COMEPHORE precipitations through wider confidence intervals.

As expected, uncertainty increases with precipitation intensity, decreases with catchment size and rain gauge density, and provides asymmetrical distributions on mean precipitations. For instance, on 2014-09-18, the mean rainfall on the small Thines at Pont de Gournier catchment ranges from 175 mm to more than 450 mm with the complete set of rain gauges, representing a factor higher than 2.5. In contrast, the uncertainty is lower (factor of 1.33) for larger catchments such as the Chassezac at Sainte-Marguerite.

#### 4.4 Case studies

To further illustrate model performance, we analyze precipitation fields for two selected events, using COMEPHORE as the reference. Subsection 2.3.1 describes the COMEPHORE data. Figure 7 presents daily precipitation maps for four catchments. While all models broadly reproduce the spatial structure of COMEPHORE fields, important differences emerge. SPAZM exhibits both local overestimation and underestimation, producing overly broad precipitation cells. rgISO also yields overly smooth fields, leading to high-intensity underestimation. arISO slightly mitigates this issue, as seen in the 2014-09-18 case, where it captures more intense precipitation than rgISO. rgANISO captures the radar anisotropy for the 2008-05-26 events but produces an inaccurate spatial structure for the 2014-09-18 event. arANISO provides the most realistic interpolation, reducing both excessive smoothing and underestimation of high intensities. It is the only stochastic model able to capture the highest precipitation values (388–444 mm) in the 2014-09-18 event, demonstrating the advantage of incorporating directional effects.

A single precipitation field does not reflect the interpolation uncertainty, leading to unwanted smoothing spatial patterns. Conditional simulations provide an attractive alternative to derive a set of equiprobably plausible fields. Figure 8 illustrates five conditional simulations with anisotropic covariance (arANISO) for the 2008-05-26 and 2014-09-18 days, revealing different spatial patterns and precipitation intensities. The Thines at Pont de Gournier catchment, located near the center of the strong cell intensities, has a substantial mean precipitation uncertainty on 2014-09-18. Simulation 49-55 gives rise to nearly 250-200 mm mean catchment precipitation, compared to more than 350-500 mm for simulation 15-95.

Figure 9 displays the AROME fields and the corresponding, as well as the isotropic and anisotropic fitted variograms using rain gauges or the corresponding AROME fields, for the two case studies. Although the AROME fields do not show the same spatial variability and precipitation intensity as COMEPHORE (Fig.7), they include nearly the same anisotropy. The 2008-05-26 event shows a higher spatial correlation in the north-south direction. The 2014-09-18 one is characteristic of a Cevenol episode with a higher spatial correlation in the southwest-to-northeast direction. Table ?? collects information about Figure 10 summarizes the anisotropy parameters  $\eta$  (anisotropy ratio) and  $\theta$  estimated in the 786 events. 50 % of events have  $\eta < 0.5$ . The directional effects mainly occur in the north-south direction to the southwest-to-northeast (anisotropy angle) estimated from AROME and COMEPHORE. Both datasets show similar preferred anisotropy directions, predominantly oriented south-north (S-N) and southwest-northeast (SW-NE), with AROME exhibiting a slightly stronger S-N component. In both cases, the anisotropy is generally more pronounced along the SW-NE direction.



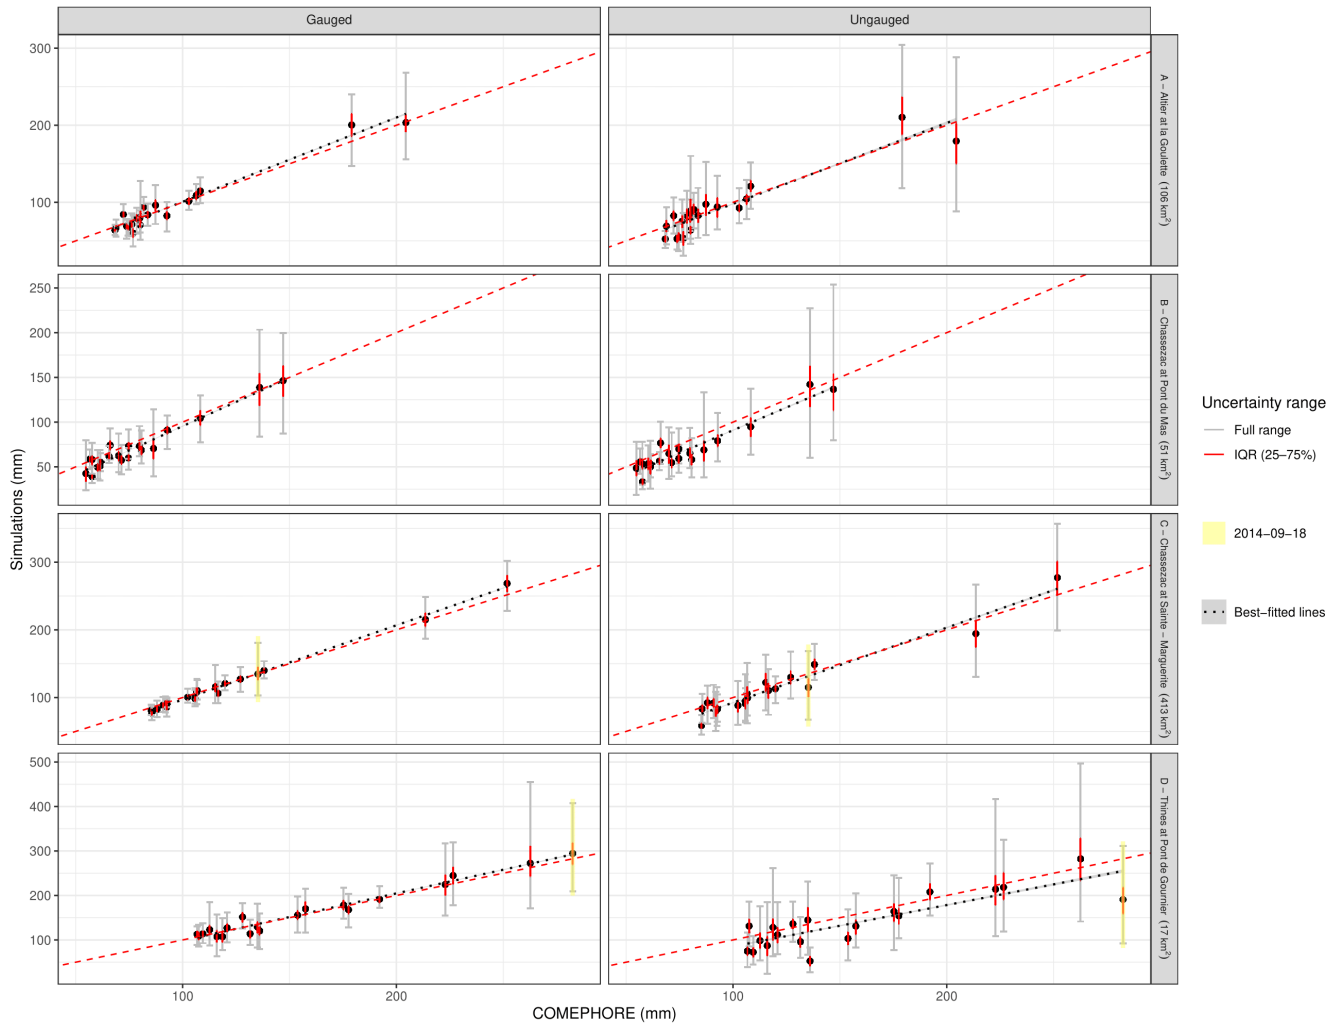

**Figure 6.** Scatter plot between mean catchment COMEPHORE (x-axis) and simulated (y-axis) precipitations in two rain gauge density scenarios: using all rain gauge-gauges available (*Gauged*, left panels), removing the rain gauge of the main catchment (*Ungauged*, right panels). The 20 days with the highest COMEPHORE precipitation are considered for each catchment represented in the vertical panels. The simulations are derived from conditional simulations with anisotropic covariance (arANISO). The vertical lines in red (grey) illustrate the 25-75 (0-100) % range of simulations. Black points indicate the ensemble means. The dashed line represents the diagonal.

**Parameter/Quantile** q0 q10 q20 q30 q40 q50 q60 q70 q80 q90 q100 0-6 11 18 23 29 39 68 158 171 180  $\eta$  1 0.80 0.67 0.62 0.56 0.50 0.48 0.43 0.38 0.31 0.18

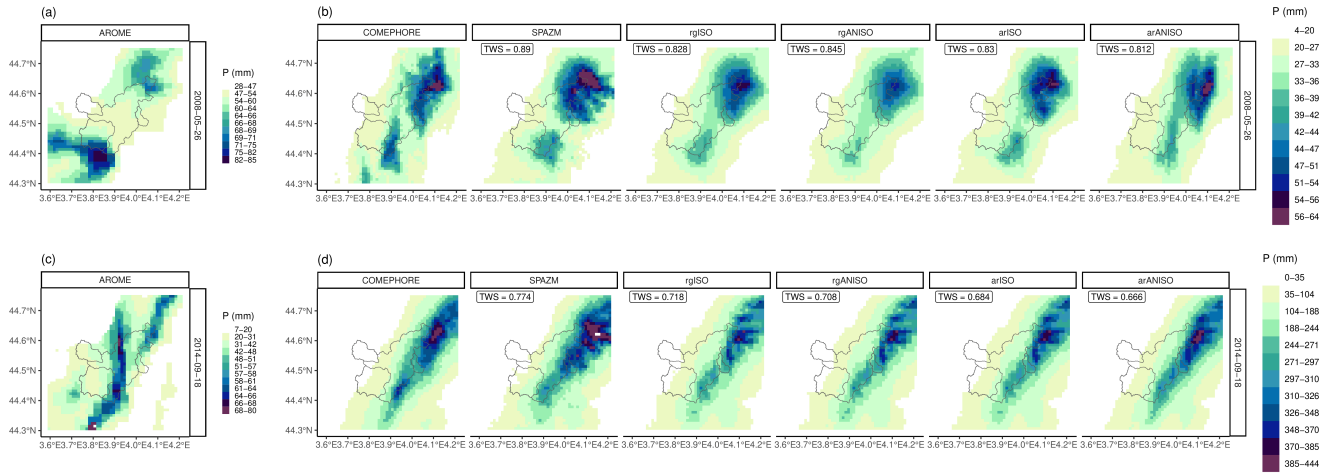

**Figure 7.** Daily precipitation field illustrations, with a focus on the four catchments for the 2008-05-26 (a) and 2014-09-18 (b) days. Daily precipitation fields are obtained with AROME, deterministic models (COMEPHORE, SPAZM) and stochastic models (rgISO, rgANISO, arISO, arANISO). For the stochastic models, the fields correspond to the mean of 100 ensemble members derived from conditional simulations. TWS (COMEPHORE as reference) are displayed for the gridded precipitation products. Precipitation is expressed in mm. Figure 1 shows the locations of the catchments.

## 5 Discussion

In this study, we derive anisotropic variograms from CP-RCM simulations for spatial interpolation of precipitation, an approach that, to our knowledge, has not been previously explored. Estimating anisotropy parameters based solely on rain gauge stations is challenging due to the sparse and irregular station networks. However, CP-RCM simulations provide a way of characterizing anisotropy. We demonstrate that anisotropic variograms improve probabilistic precipitation analysis compared to isotropic ones through both point-based and spatial evaluations. In the following, we discuss the advantages and limitations of our approach and outline the further developments that are needed.

### 5.1 Ensemble from conditional simulations versus local regression approach

This study highlights that Trans-Gaussian Random Fields (kriging with external drift) outperform local regression models in robustness and spatial variability. SPAZM, a local regression interpolator, excessively spreads precipitation cells and overcorrelates precipitation with altitude. This overcorrelation results in poor performance for convective events, leading to regional inconsistencies where SPAZM significantly underestimates or overestimates intense precipitation in localized areas. In contrast, the ensemble mean from Trans-Gaussian Random Fields shows better regional coherence, despite the global underestimation of intense precipitation. This bias is well-known in kriging studies (Hiebl and Frei, 2018). Conditional simulations from Trans-Gaussian Random Fields provide an alternative to generate more realistic precipitation. This approach accurately captures

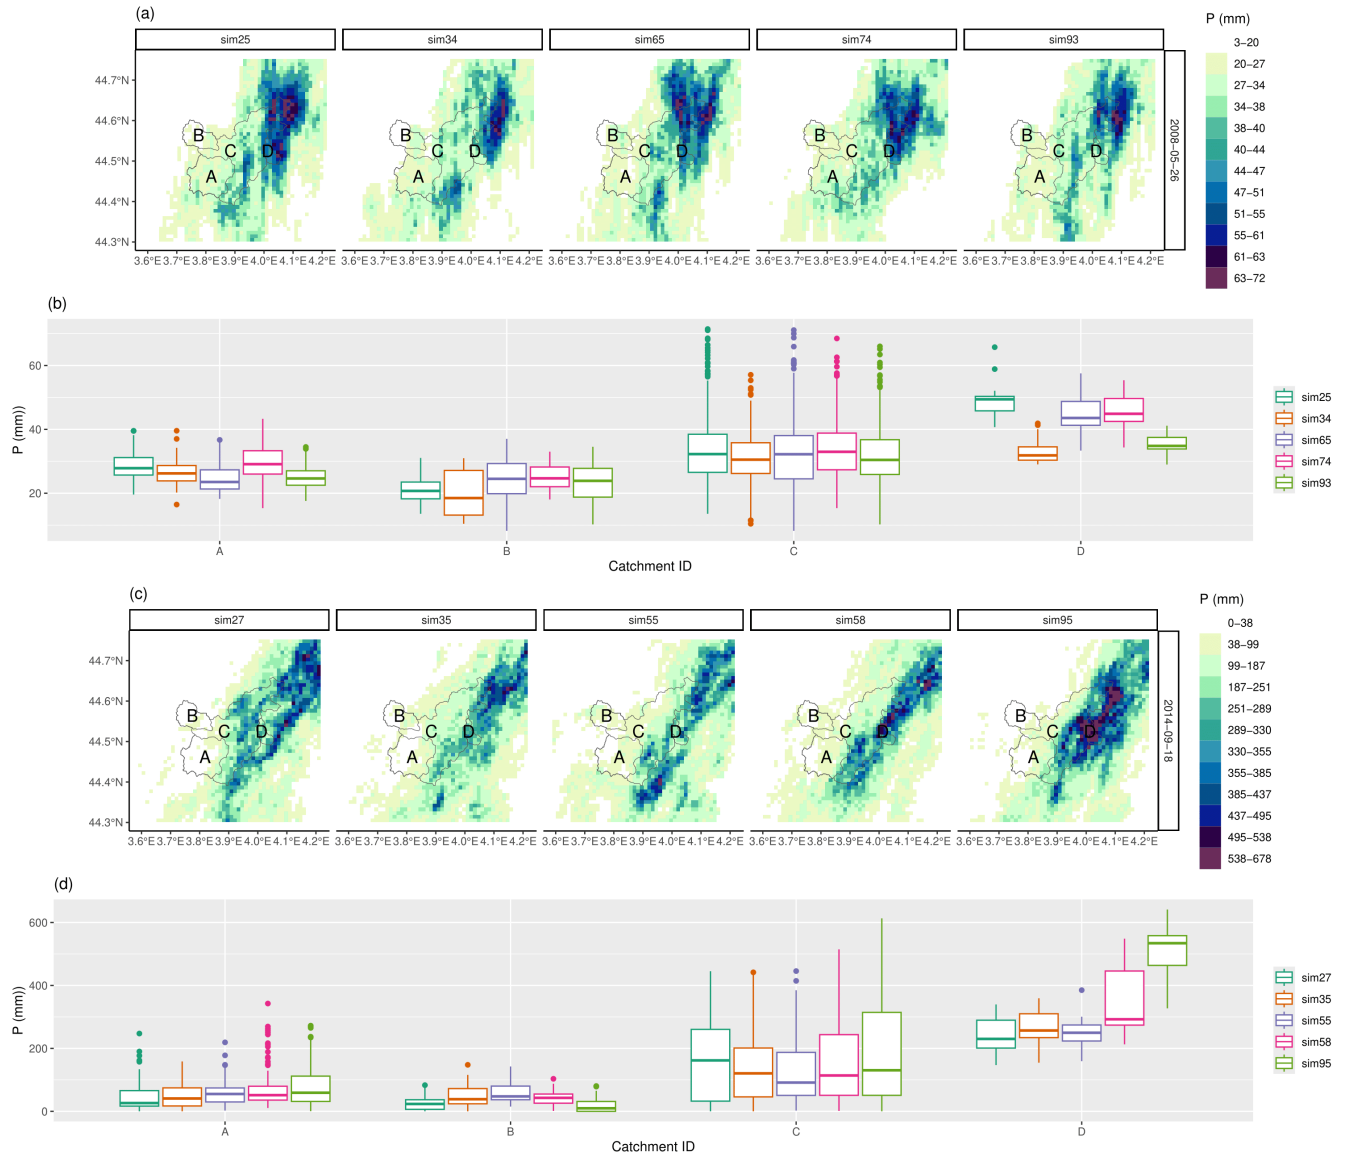

**Figure 8.** Anisotropic (arANISO) illustration of conditional simulations of daily precipitation fields, with a focus on the four catchments for the 2008-05-26 (a) and 2014-09-18 (b) (c) days. Five members are randomly sampled from a 100 ensemble, and the distribution of their precipitation values are shown ((b), (d)) for each catchment. Precipitation is expressed in mm. Figure 1 shows the locations of the catchments.

large-scale convective events. Further evaluation is needed in ungauged areas with localized convection cells and complex topography, where orographic effects drive uncertainty.

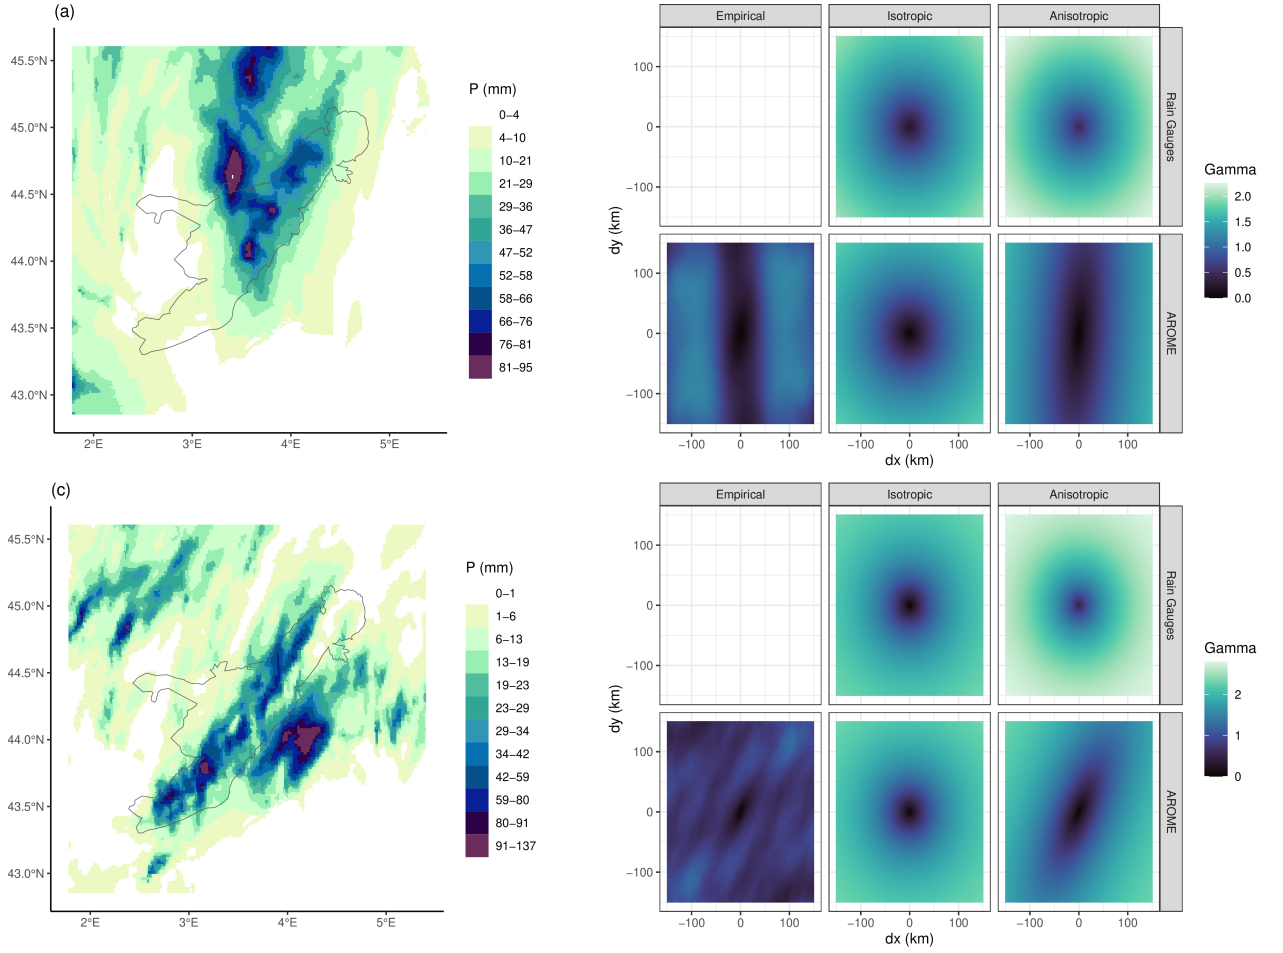

**Figure 9.** Examples of two AROME daily precipitation fields used to derive anisotropic variograms for the 2008-05-26 **(a)** and 2014-09-18 **(c)** days. Precipitation is expressed in mm. Black contours represent the Cevennes region. In the 2D variograms **(b)**, **(d)**, low (high) gamma values indicate strong (weak) spatial autocorrelation between observations, spaced from dx (dy) in horizontal (vertical) km scale.

## 5.2 Covariance estimation

Estimating anisotropic parameters typically requires a high density of rain gauge stations, a condition rarely met in practice. Our results show that CP-RCM simulations, despite their imperfections, effectively capture anisotropic precipitation structures, making them valuable for informing variogram parameters in regions with limited observational data.

390 In this study, we estimate four covariance models using weighted least squares: (1) isotropic covariance from rain gauge stations (rgISO), (2) anisotropic covariance from rain gauge stations (rgANISO), (3) isotropic covariance from CP-RCM simulations (arISO), and (4) anisotropic covariance from CP-RCM simulations (arANISO). Considering anisotropy ~~into~~in the covariance structure using rain gauges (rgANISO) does not necessarily improve interpolation performances compared to

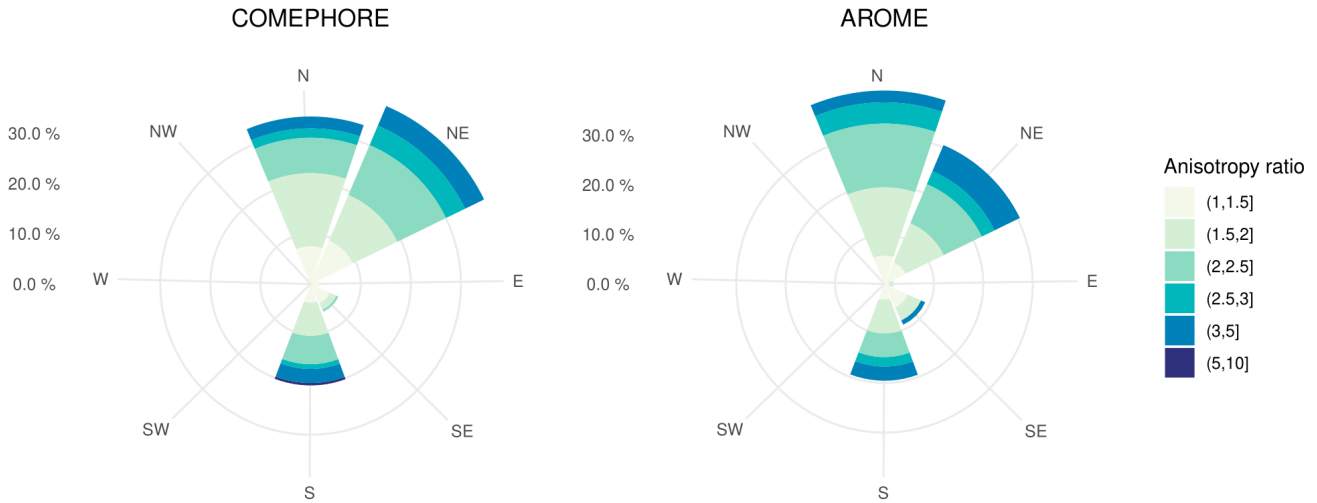

**Figure 10.** Anisotropy parameters estimated with daily AROME and COMEPHORE precipitation fields, namely the angle ( $\theta$ ) of dominant spatial autocorrelation and the anisotropy ratio ( $\eta$ ) with the corresponding orthogonal direction. ~~Deciles summarize the parameter values.~~

isotropic covariance (rgISO). ~~This~~ More specifically, for both point cross-validation and spatial variability evaluation, rgANISO  
 395 outperforms rgISO during strongly anisotropic events, whereas the opposite behavior is observed for weakly anisotropic events.  
 This indicates that anisotropy can be significant but remains difficult to robustly estimate using a rain-gauge network alone,  
 even when the network is dense. This result agrees with the few studies on covariance comparisons (Haberlandt, 2007; Shi  
 et al., 2007; Haylock et al., 2008). Using a limited number of rain gauges generates a loss of robustness in estimating the co-  
 variance parameters despite the actual anisotropy presented in the daily precipitation fields. arISO shows similar performances  
 400 to rgISO. This suggests that the rain gauge density is high enough to capture spatial autocorrelation in the study region. This  
 also implies that CP-RCM simulations could serve as a viable alternative for estimating spatial autocorrelation in areas with  
 sparse rain gauge station coverage. Estimating anisotropic parameters usually requires a large number of rain gauge stations,  
 which is rarely met in practice. arANISO outperforms the other stochastic models. This approach aligns with previous stud-  
 ies that have used radar data to infer anisotropy through nonparametric estimation (Velasco-Forero et al., 2009; Schiemann  
 405 et al., 2011; Gyasi-Agyei, 2016). High-quality CP-RCM simulations, increasingly available worldwide, might correctly carry  
 anisotropic information.

The covariance modeling in this study has two main limitations. Firstly, CP-RCM simulations may miss or inaccurately  
 generate precipitation cells, leading to biases in the estimation of covariance parameters such as the range, the anisotropy  
 ratio, and the anisotropy angle. Secondly, the assumption of second-order stationarity may not hold on large spatial do-  
 410 mains. Topographical effects might induce spatial non-stationarity in the covariance structure. The windward mountainsides  
 might encounter more spatial variability than the leeward ones. The study region has daily oceanic or Mediterranean in-  
 fluences, but not both simultaneously, limiting spatial non-stationarity. Several authors implement spatial non-stationarity

of the covariance (Paciorek and Schervish, 2006; Risser and Calder, 2017; Risser et al., 2019). For computational reasons, we decided not to include non-stationarity. Extending the method to larger and topographically complex domains would require non-stationary covariance. A practical option is to partition the region into climatologically homogeneous sub-regions, ideally preserving major watershed boundaries to maintain hydrological consistency. Alternatively, a solution is to incorporate non-stationary covariance structures, for example, through geographical coordinate deformation (Youngman, 2023) or locally stationary covariance models (Paciorek and Schervish, 2006; Risser and Calder, 2017), which would allow spatial dependence to evolve smoothly across the domain. These approaches would make the method suitable for operational applications over larger domains.

Despite those limitations, we are confident in the study's transposability to other regions of similar size with high-quality CP-RCM simulations. Furthermore, the scientific community should explore whether the same methodology can be applied using RCM simulations in regions where CP-RCM simulations are unavailable. The methodology ~~might also be applied~~ could also be extended to real-time ~~interpolation using~~, sub-daily interpolation. CP-RCM simulations are not continuously updated, so their replacement by hourly numerical weather forecasts (NWP) should be investigated. NWP assimilate past radar reflectivity and should therefore display a higher correlation with observations than CP-RCM simulations. As a result, NWP could allow us to extract precipitation intensity, spatial patterns, and spatial variability, while quantifying interpolation uncertainty through conditional simulations and the use of ensemble NWP forecasts. A natural follow-up would be to use NWP forecasts as both drift and covariance structures within a kriging-with-external-drift framework (Velasco-Forero et al., 2009; Schiemann et al., 2011). At the daily timescale, timesteps are typically considered independent, but this assumption no longer holds at the hourly scale. To address this, temporal dependence should be incorporated into the model, as done in Sideris et al. (2014); Frey and Frei (2025). A major limitation is the limited availability of sub-daily rain gauges. One potential solution to bypass this shortcoming is to disaggregate daily interpolated fields using radar data or numerical weather forecasts.

### 5.3 Quantification of interpolation uncertainty

We assess precipitation interpolation uncertainty at the catchment scale, which is relevant for hydrological applications. For very small catchments ( $17 \text{ km}^2$ ), the simulated mean catchment precipitation can vary widely by a factor of 2.5, highlighting substantial uncertainty despite high rain gauge density. Using a gamma distribution to normalize daily observations creates an asymmetrical distribution of mean catchment precipitation, which appears to be physically reasonable. Other authors (Erdin et al., 2012; Frei and Isotta, 2019) frequently used the Box-Cox transformation to normalize data, causing uncertainties in the back-transformation step. Box-Cox transformations can lead to over- or under-normalization, artificially inflating or deflating the uncertainty in spatial interpolation. Standard square root transformation, a special case of Box-Cox (parameter equal to 0.5), often leads to flattening high precipitation values (Erdin et al., 2012), causing underestimation of spatial interpolation uncertainty.

Uncertainty in precipitation analysis mainly arises from precipitation undercatch and spatial interpolation methods. In this study, rainfall prevails over snowfall, and precipitation undercatch might be considered negligible. However, in snow-dominated regions, precipitation undercatch is significant (Sevruk et al., 2009; Pollock et al., 2018) under windy conditions. We

propose fitting an asymmetrical gamma distribution to the catch ratio to handle this issue. The parameters of this distribution would depend on several factors, including the precipitation phase (rain or snow), precipitation intensity, rain gauge type, its exposure, and wind speed.

450 While we modeled the primary sources of uncertainty related to spatial interpolation, additional uncertainty remains undressed:

- We assume fixed parameters for the gamma distribution used to normalize the data. A natural extension would be to generate multiple sets of gamma parameters and run conditional simulations for each.
- The seasonal climatological background fields used in this study are treated as deterministic despite inherent uncertain-  
455 ties. Further developments should explore probabilistic background fields to propagate uncertainty better.
- In addition, we did not consider the uncertainty related to the estimation of the covariance parameters. Bayesian inference to estimate covariance parameters (Frei and Isotta, 2019), using informative priors derived from CP-RCM simulations, is a logical extension.

Bayesian hierarchical models present an ideal framework to deal with this combination of interdependent uncertainties that  
460 can be propagated into hydrological models.

## 6 Conclusion

This study compares different covariance estimations for conditional simulations of daily precipitation using rain gauge stations. The evaluated models include (1) a local regression interpolator called SPAZM; Trans-Gaussian Random Fields with (2) isotropic covariance estimated with rain gauges, (3) anisotropic covariance estimated with rain gauges, (4) isotropic, and  
465 (5) anisotropic covariances estimated from daily CP-RCM simulations. The expectation of the Random Fields is a function of topographical variables and a seasonal climatological background field. We assess interpolation performance through cross-validation and a spatial metric, using radar-derived analysis as a reference.

Results indicate that Trans-Gaussian Random Fields modeling, whatever the covariance used, consistently outperforms the local regression interpolator SPAZM in cross-validation and spatial metrics. The geostatistical models are more robust to  
470 low rain gauge density and resemble ~~more radar fields~~ radar fields more. Among the covariance models tested, anisotropic covariance derived from CP-RCM simulations better captures directional precipitation structures observed in radar data and shows superior cross-validation scores for both ensemble mean and spread. By bypassing the lack of robustness of anisotropy estimation using sparse rain gauge networks, this approach reveals the clear value of incorporating anisotropy into the spatial interpolation of daily precipitation. The obtained ensemble of 100 mean catchment precipitation simulations successfully  
475 encompasses radar-based estimates for intense precipitation events, highlighting its potential for uncertainty quantification, a key consideration for hydrological modeling.

These findings suggest that deriving anisotropic variograms from high-quality CP-RCM simulations is a promising approach for probabilistic precipitation interpolation. A natural extension of this work is to integrate the generated precipitation ensembles into probabilistic hydrological modeling, further improving flood risk assessment and water resource management.

## 480 **Acknowledgements**

We are grateful for the AROME simulations provided by Cécile Caillaud and Diego Monteiro. [We thank the two reviewers who helped to improve the article.](#)

## **Conflict of interest**

The authors declare no conflict of interest.

## 485 **Code and data availability**

AROME is available from the Med CORDEX Portal (<https://www.medcordex.eu/search/index.php>, last access: 02<sup>nd</sup> May 2024). The  codes used to perform the analysis are available upon reasonable request by contacting the first author directly.

## **Author contributions**

VD conceived the idea, carried out the analysis, and wrote the article. GE, DP, and AF participated in the discussion and design  
490 of this study and contributed to writing and editing the paper.

## **Competing interests**

The authors declare no conflict of interest.

## **Acknowledgements**

## **Financial support**

495 This research has been supported by Electricité de France (EDF).



## References

- Adhikary, S. K., Muttil, N., and Yilmaz, A. G.: Cokriging for enhanced spatial interpolation of rainfall in two Australian catchments, *Hydrological Processes*, 31, 2143–2161, <https://doi.org/10.1002/hyp.11163>, 2017.
- Alexandersson, H.: A homogeneity test applied to precipitation data, *Journal of climatology*, 6, 661–675, 1986.
- 500 Alpuim, T. and Barbosa, S.: The Kalman filter in the estimation of area precipitation, *Environmetrics*, 10, 377–394, [https://doi.org/10.1002/\(SICI\)1099-095X\(199907/08\)10:4<377::AID-ENV363>3.0.CO;2-L](https://doi.org/10.1002/(SICI)1099-095X(199907/08)10:4<377::AID-ENV363>3.0.CO;2-L), 1999.
- Ban, N., Caillaud, C., Coppola, E., Pichelli, E., Sobolowski, S., Adinolfi, M., Ahrens, B., Alias, A., Anders, I., Bastin, S., Belušić, D., Berthou, S., Brisson, E., Cardoso, R. M., Chan, S. C., Christensen, O. B., Fernández, J., Fita, L., Frisius, T., Gašparac, G., Giorgi, F., Goergen, K., Haugen, J. E., Hodnebrog, O., Kartsios, S., Katragkou, E., Kendon, E. J., Keuler, K., Lavin-Gullon, A., Lenderink, G., 505 Leutwyler, D., Lorenz, T., Maraun, D., Mercogliano, P., Milovac, J., Panitz, H.-J., Raffa, M., Remedio, A. R., Schär, C., Soares, P. M. M., Srnec, L., Steensen, B. M., Stocchi, P., Tölle, M. H., Truhetz, H., Vergara-Temprado, J., de Vries, H., Warrach-Sagi, K., Wulfmeyer, V., and Zander, M. J.: The first multi-model ensemble of regional climate simulations at kilometer-scale resolution, part I: evaluation of precipitation, *Climate Dynamics*, 57, 275–302, <https://doi.org/10.1007/s00382-021-05708-w>, 2021.
- Bostan, P. A., Heuvelink, G. B. M., and Akyurek, S. Z.: Comparison of regression and kriging techniques for mapping the average annual precipitation of Turkey, *International Journal of Applied Earth Observation and Geoinformation*, 19, 115–126, <https://doi.org/10.1016/j.jag.2012.04.010>, 2012.
- 510 Brousseau, P., Seity, Y., Ricard, D., and Léger, J.: Improvement of the forecast of convective activity from the AROME-France system, Royal Meteorological Society, <https://rmets.onlinelibrary.wiley.com/doi/abs/10.1002/qj.2822>, 2016.
- Bárdossy, A. and Pegram, G.: Interpolation of precipitation under topographic influence at different time scales, *Water Resources Research*, 515 49, 4545–4565, <https://doi.org/10.1002/wrcr.20307>, 2013.
- Caillaud, C., Somot, S., Alias, A., Bernard-Bouissières, I., Fumière, Q., Laurantin, O., Seity, Y., and Ducrocq, V.: Modelling Mediterranean heavy precipitation events at climate scale: an object-oriented evaluation of the CNRM-AROME convection-permitting regional climate model, *Climate Dynamics*, 56, 1717–1752, <https://doi.org/10.1007/s00382-020-05558-y>, 2021.
- Canellas, C., Gibelin, A.-L., Lassègues, P., Kerdoncuff, M., Dandin, P., and Simon, P.: Les normales climatiques spatialisées Aurelhy 1981- 520 2010 : températures et précipitations, *La Météorologie*, pp. 47–55, <https://doi.org/10.4267/2042/53750>, 2014.
- Champeaux, J.-L., Dupuy, P., Laurantin, O., Soulan, I., Tabary, P., and Soubeyroux, J.-M.: Les mesures de précipitations et l’estimation des lames d’eau à Météo-France : état de l’art et perspectives, *La Houille Blanche*, Numero 5, 28–34, <https://doi.org/10.1051/lhb/2009052>, 2009.
- Cressie, N.: *Statistics for spatial data*, John Wiley & Sons, 1991.
- 525 Daly, C., Neilson, R. P., and Phillips, D. L.: A Statistical-Topographic Model for Mapping Climatological Precipitation over Mountainous Terrain, *Journal of Applied Meteorology and Climatology*, 33, 140–158, [https://doi.org/10.1175/1520-0450\(1994\)033<0140:ASTMFM>2.0.CO;2](https://doi.org/10.1175/1520-0450(1994)033<0140:ASTMFM>2.0.CO;2), 1994.
- Dee, D., P. d., Uppala, Simmons, Berrisford, Poli, P., Kobayashi, S., Andrae, U., Balmaseda, M., Balsamo, G., Bauer, Bechtold, Beljaars, Berg, v., Bidlot, J., Bormann, N., Delsol, Dragani, R., Fuentes, M., and Vitart, F.: The ERA-Interim reanalysis: Configuration and performance of the data assimilation system, *Quarterly Journal of the Royal Meteorological Society*, 137, 553–597, 530 <https://doi.org/10.1002/qj.828>, 2011.

- Delignette-Muller, M. L. and Dutang, C.: *fitdistrplus: An R Package for Fitting Distributions*, *Journal of Statistical Software*, 64, 1–34, <https://doi.org/10.18637/jss.v064.i04>, 2015.
- Delrieu, G., Nicol, J., Yates, E., Kirstetter, P.-E., Creutin, J.-D., Anquetin, S., Obled, C., Saulnier, G.-M., Ducrocq, V., Gaume, E., et al.:  
535 The catastrophic flash-flood event of 8–9 September 2002 in the Gard Region, France: a first case study for the Cévennes–Vivarais  
Mediterranean Hydrometeorological Observatory, *Journal of hydrometeorology*, 6, 34–52, 2005.
- Devers, A., Vidal, J.-P., Lauvernet, C., and Vannier, O.: FYRE Climate: a high-resolution reanalysis of daily precipitation and temperature in  
France from 1871 to 2012, *Climate of the Past*, 17, 1857–1879, <https://doi.org/10.5194/cp-17-1857-2021>, 2021.
- Devers, A., Vidal, J.-P., Lauvernet, C., Vannier, O., and Caillouet, L.: 140-year daily ensemble streamflow reconstructions over 661 catch-  
540 ments in France, *Hydrology and Earth System Sciences*, 28, 3457–3474, <https://doi.org/10.5194/hess-28-3457-2024>, 2024.
- Diggle, P. J., Ribeiro, P. J., and Christensen, O. F.: *An introduction to model-based geostatistics*, *Spatial statistics and computational methods*,  
pp. 43–86, publisher: Springer, 2003.
- Dura, V., Evin, G., Favre, A.-C., and Penot, D.: Spatial Interpolation of Seasonal Precipitations Using Rain Gauge Data and Convection-  
Permitting Regional Climate Model Simulations in a Complex Topographical Region, *International Journal of Climatology*, 44, 5745–  
545 5760, <https://doi.org/10.1002/joc.8662>, 2024.
- Erdin, R., Frei, C., and Künsch, H. R.: Data Transformation and Uncertainty in Geostatistical Combination of Radar and Rain Gauges,  
*Journal of Hydrometeorology*, 13, 1332–1346, <https://doi.org/10.1175/JHM-D-11-096.1>, 2012.
- Evin, G., Le Lay, M., Fouchier, C., Penot, D., Colleoni, F., Mas, A., Garambois, P.-A., and Laurantin, O.: Evaluation of hydrological  
models on small mountainous catchments: impact of the meteorological forcings, *Hydrology and Earth System Sciences*, 28, 261–281,  
550 <https://doi.org/10.5194/hess-28-261-2024>, publisher: Copernicus GmbH, 2024.
- Fantini, A., Raffaele, F., Torma, C., Bacer, S., Coppola, E., Giorgi, F., Ahrens, B., Dubois, C., Sanchez, E., and Verdecchia, M.: Assessment  
of multiple daily precipitation statistics in ERA-Interim driven Med-CORDEX and EURO-CORDEX experiments against high resolution  
observations, *Climate Dynamics*, 51, 877–900, <https://doi.org/10.1007/s00382-016-3453-4>, 2018.
- Frei and Isotta: Ensemble Spatial Precipitation Analysis From Rain Gauge Data: Methodology and Application in the European Alps, *JGR*  
555 *Atmospheres*, <https://doi.org/10.1029/2018JD030004>, place: Suisse Zurich, 2019.
- Frey, L. and Frei, C.: Interpolation of Hourly Surface Air Temperature—Application of a Spatio-Temporal Statistical Model in Complex  
Terrain, *International Journal of Climatology*, n/a, e8796, <https://doi.org/10.1002/joc.8796>, 2025.
- Gerber, F., Besic, N., Sharma, V., Mott, R., Daniels, M., Gabella, M., Berne, A., Germann, U., and Lehning, M.: Spatial variability in snow  
precipitation and accumulation in COSMO–WRF simulations and radar estimations over complex terrain, *The Cryosphere*, 12, 3137–  
560 3160, <https://doi.org/10.5194/tc-12-3137-2018>, 2018.
- Goovaerts, P.: Geostatistical approaches for incorporating elevation into the spatial interpolation of rainfall, *Journal of Hydrology*, 228,  
113–129, [https://doi.org/10.1016/S0022-1694\(00\)00144-X](https://doi.org/10.1016/S0022-1694(00)00144-X), 2000.
- Gottardi, F.: Estimation statistique et réanalyse des précipitations en montagne. Utilisation d’ébauches par types de temps et assimilation de  
données d’enneigement. Application aux grands massifs montagneux français, phdthesis, Institut National Polytechnique de Grenoble -  
565 INPG, <https://tel.archives-ouvertes.fr/tel-00419170>, 2009.
- Guédé, K. G., Yu, Z., Hofmeister, F., Gu, H., Mohammadi, B., Chen, X., Lin, H., Shen, T., and Gouertoumbo, W. F.: Geostatistical Interpol-  
ation Approach for Improving Flood Simulation Within a Data-Scarce Region in the Tibetan Plateau, *Hydrological Processes*, 38, e15 336,  
<https://doi.org/10.1002/hyp.15336>, 2024.

- Gyasi-Agyei, Y.: Assessment of radar-based locally varying anisotropy on daily rainfall interpolation, *Hydrological Sciences Journal*, 61, 1890–1902, <https://doi.org/10.1080/02626667.2015.1083652>, 2016.
- Gyasi-Agyei, Y.: Realistic sampling of anisotropic correlogram parameters for conditional simulation of daily rainfields, *Journal of Hydrology*, 556, 1064–1077, <https://doi.org/10.1016/j.jhydrol.2016.10.014>, 2018.
- Haberlandt, U.: Geostatistical interpolation of hourly precipitation from rain gauges and radar for a large-scale extreme rainfall event, *Journal of Hydrology*, 332, 144–157, <https://doi.org/10.1016/j.jhydrol.2006.06.028>, 2007.
- Haylock, M. R., Hofstra, N., Klein Tank, A. M. G., Klok, E. J., Jones, P. D., and New, M.: A European daily high-resolution gridded data set of surface temperature and precipitation for 1950–2006, *Journal of Geophysical Research: Atmospheres*, 113, <https://doi.org/10.1029/2008JD010201>, 2008.
- Hengl, T., Nussbaum, M., Wright, M., Heuvelink, G., and Graeler, B.: Random forest as a generic framework for predictive modeling of spatial and spatio-temporal variables, *PeerJ*, 6, e5518, <https://doi.org/10.7717/peerj.5518>, 2018.
- Hiebl, J. and Frei, C.: Daily precipitation grids for Austria since 1961—development and evaluation of a spatial dataset for hydroclimatic monitoring and modelling, *Theoretical and Applied Climatology*, 132, 327–345, <https://doi.org/10.1007/s00704-017-2093-x>, 2018.
- Hofstra, N., New, M., and McSweeney, C.: The influence of interpolation and station network density on the distributions and trends of climate variables in gridded daily data, *Climate Dynamics*, 35, 841–858, <https://doi.org/10.1007/s00382-009-0698-1>, 2010.
- Hunter, R. D. and Meentemeyer, R. K.: Climatologically Aided Mapping of Daily Precipitation and Temperature, *Journal of Applied Meteorology and Climatology*, 44, 1501–1510, <https://doi.org/10.1175/JAM2295.1>, 2005.
- Keuler, K., Radtke, K., Kotlarski, S., and Lüthi, D.: Regional climate change over Europe in COSMO-CLM: Influence of emission scenario and driving global model, *Meteorologische Zeitschrift*, pp. 121–136, <https://doi.org/10.1127/metz/2016/0662>, 2016.
- MacQueen, J.: Some methods for classification and analysis of multivariate observations, in: *Proceedings of the Fifth Berkeley Symposium on Mathematical Statistics and Probability, Volume 1: Statistics*, vol. 5, pp. 281–298, University of California press, 1967.
- Masson, D. and Frei, C.: Spatial analysis of precipitation in a high-mountain region: exploring methods with multi-scale topographic predictors and circulation types, *Hydrology and Earth System Sciences*, 18, 4543–4563, <https://doi.org/10.5194/hess-18-4543-2014>, 2014.
- Matheson, J. E. and Winkler, R. L.: Scoring Rules for Continuous Probability Distributions, *Management Science*, <https://doi.org/10.1287/mnsc.22.10.1087>, 1976.
- Monteiro, D., Caillaud, C., Samacoïts, R., Lafaysse, M., and Morin, S.: Potential and limitations of convection-permitting CNRM-AROME climate modelling in the French Alps, *International Journal of Climatology*, 42, 7162–7185, <https://doi.org/10.1002/joc.7637>, 2022.
- Nabat, P., Somot, S., Cassou, C., Mallet, M., Michou, M., Bouniol, D., Decharme, B., Drugé, T., Roehrig, R., and Saint-Martin, D.: Modulation of radiative aerosols effects by atmospheric circulation over the Euro-Mediterranean region, *Atmospheric Chemistry and Physics*, 20, 8315–8349, <https://doi.org/10.5194/acp-20-8315-2020>, 2020.
- Paciorek, C. J. and Schervish, M. J.: Spatial modelling using a new class of nonstationary covariance functions, *Environmetrics*, 17, 483–506, <https://doi.org/10.1002/env.785>, 2006.
- Pebesma, E. J.: Multivariable geostatistics in S: the gstat package, *Computers & Geosciences*, 30, 683–691, <https://doi.org/10.1016/j.cageo.2004.03.012>, 2004.
- Penot, D.: Cartographie des événements hydrologiques extrêmes et estimation SCHADEX en sites non jaugés, phdthesis, Université de Grenoble, <https://theses.hal.science/tel-01233267>, pages: 262, 2014.

- 605 Pollock, M. D., O'Donnell, G., Quinn, P., Dutton, M., Black, A., Wilkinson, M. E., Colli, M., Stagnaro, M., Lanza, L. G., Lewis, E., Kilsby, C. G., and O'Connell, P. E.: Quantifying and Mitigating Wind-Induced Undercatch in Rainfall Measurements, *Water Resources Research*, 54, 3863–3875, <https://doi.org/10.1029/2017WR022421>, 2018.
- Rao, C. R., Rao, C. R., Statistiker, M., Rao, C. R., and Rao, C. R.: *Linear statistical inference and its applications*, vol. 2, Wiley New York, <https://academic.oup.com/jlms/article-pdf/doi/10.1112/jlms/s1-42.1.382b/2509705/s1-42-1-382b.pdf>, 1973.
- 610 Risser, M. D. and Calder, C. A.: Local likelihood estimation for covariance functions with spatially-varying parameters: the convoSPAT package for R, *arXiv*, <https://doi.org/10.48550/arXiv.1507.08613>, 2017.
- Risser, M. D., Paciorek, C. J., Wehner, M. F., O'Brien, T. A., and Collins, W. D.: A probabilistic gridded product for daily precipitation extremes over the United States, *Climate Dynamics*, 53, 2517–2538, <https://doi.org/10.1007/s00382-019-04636-0>, 2019.
- Rockel, B., Will, A., and Hense, A.: The Regional Climate Model COSMO-CLM (CCLM), *Meteorologische Zeitschrift*, pp. 347–348, <https://doi.org/10.1127/0941-2948/2008/0309>, 2008.
- 615 Ruelland, D.: Should altitudinal gradients of temperature and precipitation inputs be inferred from key parameters in snow-hydrological models?, *Hydrology and Earth System Sciences*, 24, 2609–2632, <https://doi.org/10.5194/hess-24-2609-2020>, 2020.
- Schabenberger, O. and Gotway, C. A.: *Statistical Methods for Spatial Data Analysis*, CRC Press, 2005.
- Schiemann, R., Erdin, R., Willi, M., Frei, C., Berenguer, M., and Sempere-Torres, D.: Geostatistical radar-raingauge combination with nonparametric correlograms: methodological considerations and application in Switzerland, *Hydrology and Earth System Sciences*, 15, 1515–1536, <https://doi.org/10.5194/hess-15-1515-2011>, 2011.
- 620 Sekulić, A., Kilibarda, M., Heuvelink, G. B. M., Nikolić, M., and Bajat, B.: Random Forest Spatial Interpolation, *Remote Sensing*, 12, 1687, <https://doi.org/10.3390/rs12101687>, 2020.
- Sevruk, B., Ondrás, M., and Chvíla, B.: The WMO precipitation measurement intercomparisons, *Atmospheric Research*, 92, 376–380, <https://doi.org/10.1016/j.atmosres.2009.01.016>, 2009.
- 625 Shi, Y., Li, L., and Zhang, L.: Application and comparing of IDW and Kriging interpolation in spatial rainfall information, in: *Geoinformatics 2007: Geospatial Information Science*, vol. 6753, pp. 539–550, SPIE, <https://doi.org/10.1117/12.761859>, 2007.
- Sideris, I. V., Gabella, M., Erdin, R., and Germann, U.: Real-time radar–rain-gauge merging using spatio-temporal co-kriging with external drift in the alpine terrain of Switzerland, *Quarterly Journal of the Royal Meteorological Society*, 140, 1097–1111, <https://doi.org/10.1002/qj.2188>, 2014.
- 630 Teweles, S. and Wobus, H. B.: Verification of Prognostic Charts, *Bulletin of the American Meteorological Society*, <https://doi.org/10.1175/1520-0477-35.10.455>, section: *Bulletin of the American Meteorological Society*, 1954.
- Tobin, C., Nicotina, L., Parlange, M. B., Berne, A., and Rinaldo, A.: Improved interpolation of meteorological forcings for hydrologic applications in a Swiss Alpine region, *Journal of Hydrology*, 401, 77–89, <https://doi.org/10.1016/j.jhydrol.2011.02.010>, 2011.
- 635 Tobler, W. R.: A computer movie simulating urban growth in the Detroit region, *Economic geography*, 46, 234–240, publisher: Taylor & Francis, 1970.
- Velasco-Forero, C. A., Sempere-Torres, D., Cassiraga, E. F., and Jaime Gómez-Hernández, J.: A non-parametric automatic blending methodology to estimate rainfall fields from rain gauge and radar data, *Advances in Water Resources*, 32, 986–1002, <https://doi.org/10.1016/j.advwatres.2008.10.004>, 2009.
- 640 Verdin, A., Funk, C., Rajagopalan, B., and Kleiber, W.: Kriging and Local Polynomial Methods for Blending Satellite-Derived and Gauge Precipitation Estimates to Support Hydrologic Early Warning Systems, *IEEE Transactions on Geoscience and Remote Sensing*, 54, 2552–2562, <https://doi.org/10.1109/TGRS.2015.2502956>, 2016.

- Vernay, M., Lafaysse, M., and Augros, C.: Radar based high resolution ensemble precipitation analyses over the French Alps, *EGUsphere*, pp. 1–41, <https://doi.org/10.5194/egusphere-2024-668>, publisher: Copernicus GmbH, 2024.
- 645 Yan, J., Li, F., Bárdossy, A., and Tao, T.: Conditional simulation of spatial rainfall fields using random mixing: a study that implements full control over the stochastic process, *Hydrology and Earth System Sciences*, 25, 3819–3835, <https://doi.org/10.5194/hess-25-3819-2021>, publisher: Copernicus GmbH, 2021.
- Youngman, B. D.: deform: An R Package for Nonstationary Spatial Gaussian Process Models by Deformations and Dimension Expansion, *arXiv preprint arXiv:2311.05272*, 2023.
- 650 Zandi, O., Zahraie, B., Nasser, M., and Behrangi, A.: Stacking machine learning models versus a locally weighted linear model to generate high-resolution monthly precipitation over a topographically complex area, *Atmospheric Research*, 272, 106159, <https://doi.org/10.1016/j.atmosres.2022.106159>, 2022.
